# Supplementary material for: Graphitic carbon nitride supported neodymium oxide as an efficient recyclable nanocatalyst for the one-pot synthesis of diazabenzo[a]anthraceneones
Source: Royal Society of Chemistry journal article supplement (doi:10.1039/d1dt03695e), 2021-12-03
Supplement: d1dt03695e1.pdf [file d1dt03695e1.pdf]

## Supporting Information

**Graphitic-carbon nitride supported neodymium oxide as an efficient recyclable nanocatalyst for one-pot synthesis of diazabenz[a]anthraceneones**

Soraya Rahmatinejad, Hossein Naeimi\*

Department of Organic Chemistry, Faculty of Chemistry, University of Kashan, Kashan

87317-51167, I.R. Iran; Tel: 983155912388; Fax: 983155912397; E-mail: [naeimi@kashanu.ac.ir](mailto:naeimi@kashanu.ac.ir)

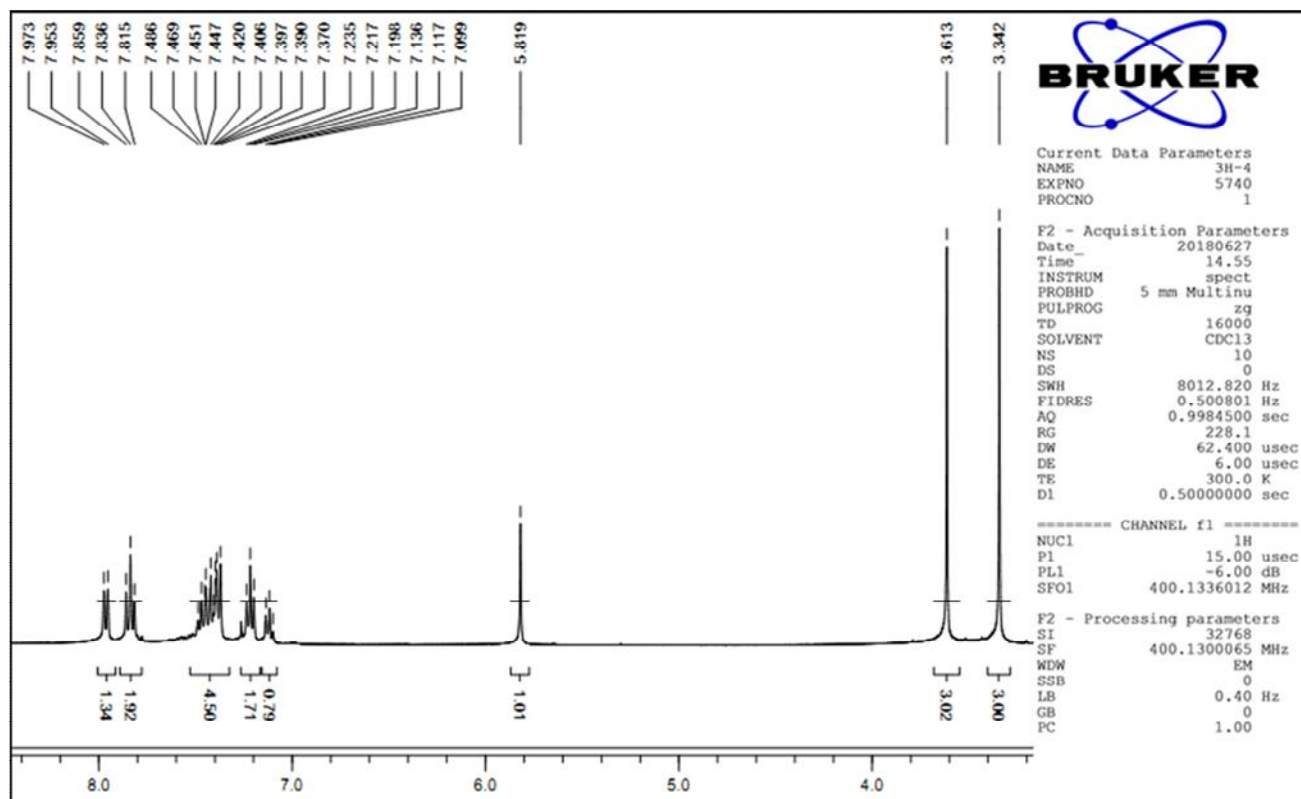

<sup>1</sup>H NMR of 8,10-Dimethyl-12-phenyl-8,12-dihydro-7-oxa-8,10-diaza-benzo[a]anthracene-9,11-dione

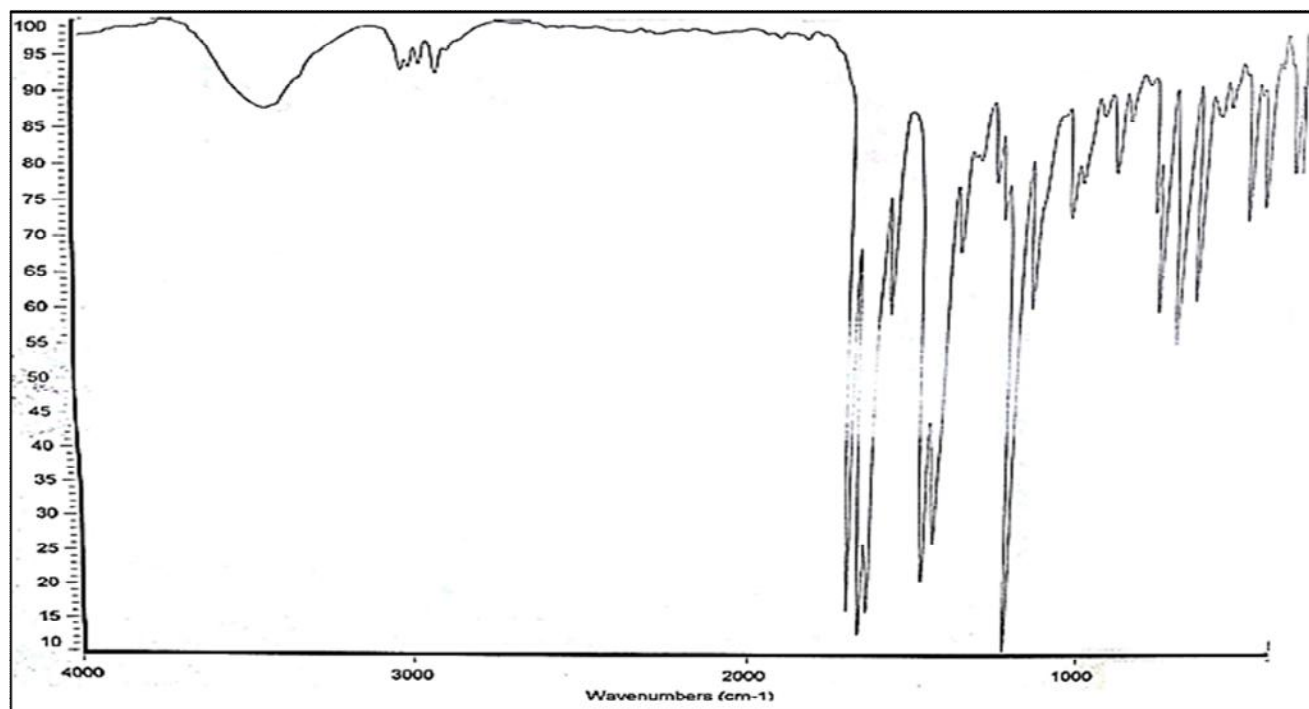

IR of 8,10-Dimethyl-12-phenyl-8,12-dihydro-7-oxa-8,10-diaza-benzo[a]anthracene-9,11-dione

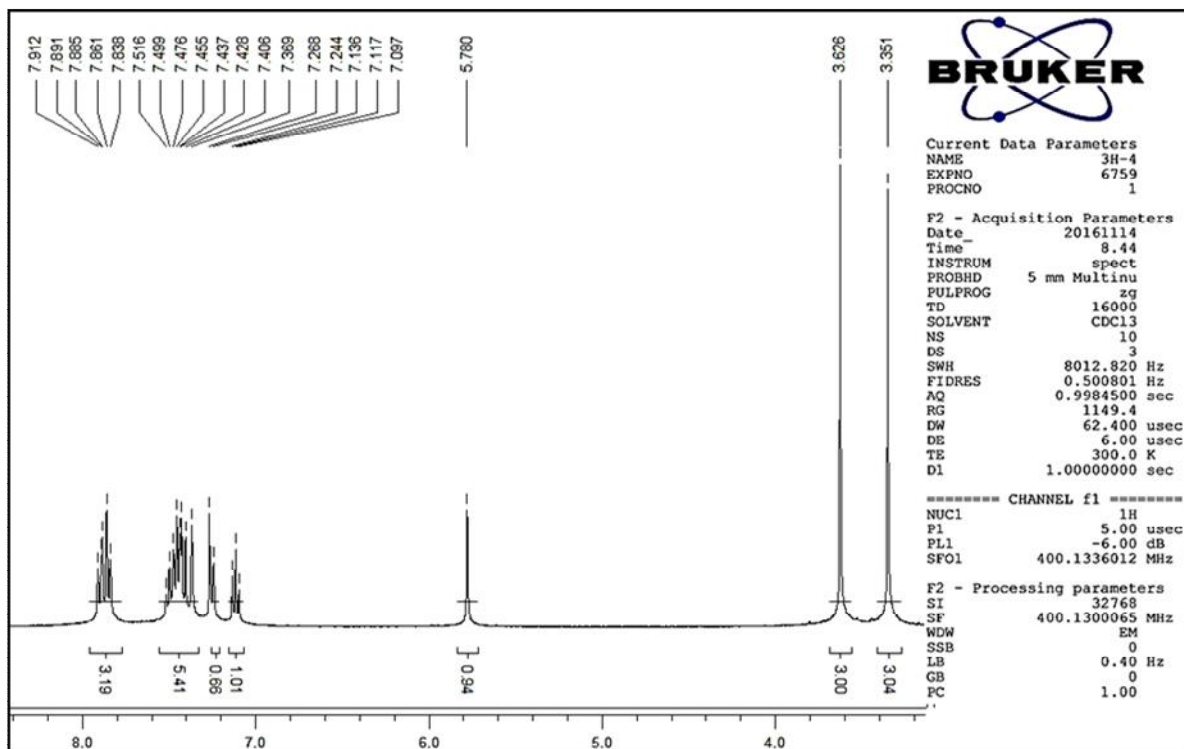

<sup>1</sup>H NMR of 12-(3-Bromo-phenyl)-8,10-dimethyl-8,12-dihydro-7-oxa-8,10-diaza-benzo[a]anthracene-9,11-dione

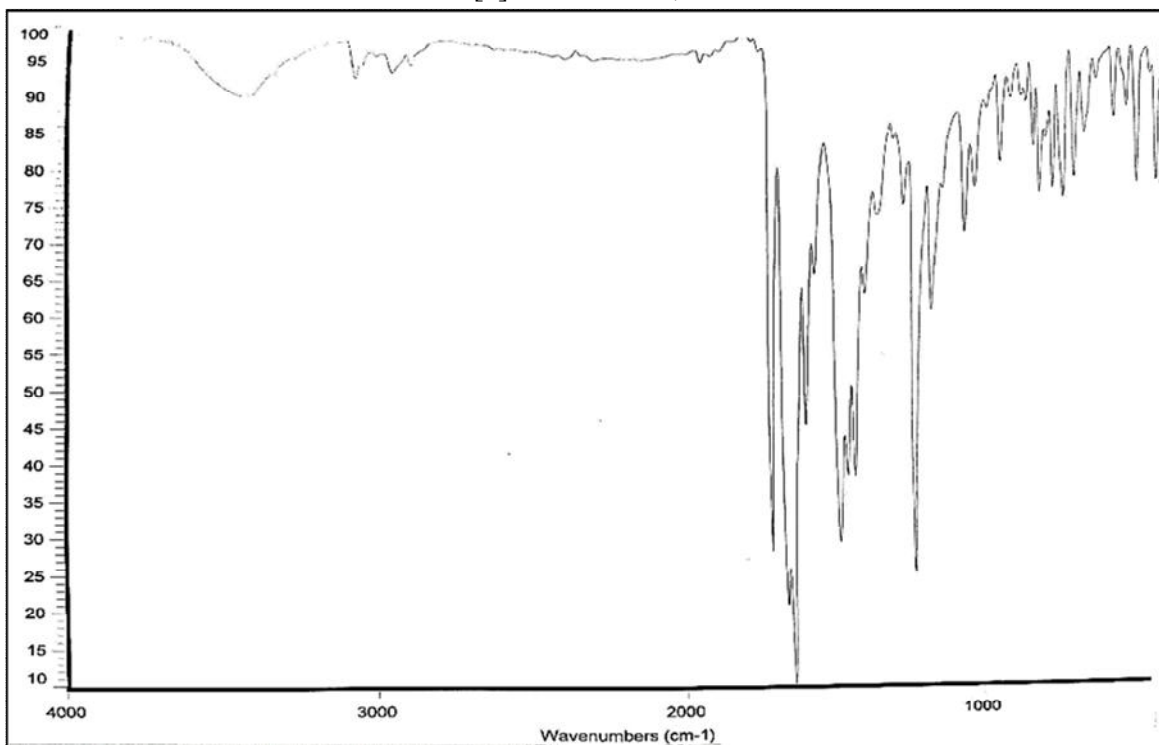

IR of 12-(3-Bromo-phenyl)-8,10-dimethyl-8,12-dihydro-7-oxa-8,10-diaza-benzo[a]anthracene-9,11-dione

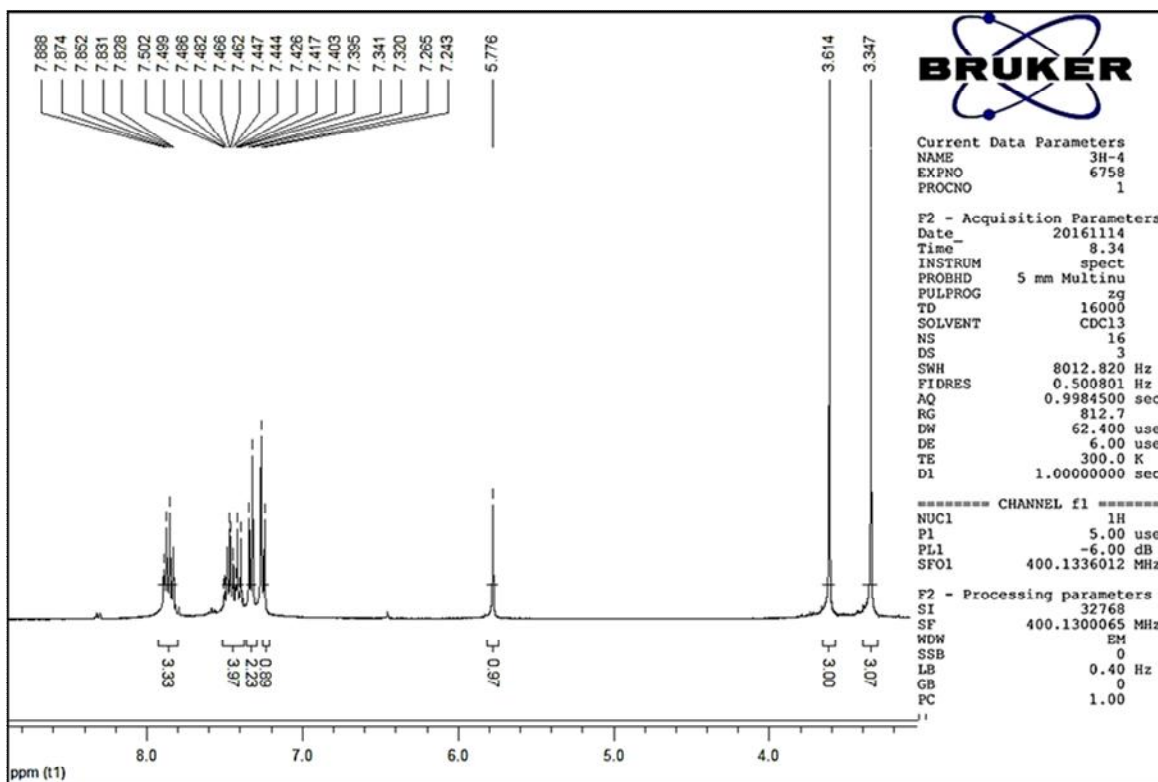

<sup>1</sup>H NMR of 12-(4-Bromo-phenyl)-8,10-dimethyl-8,12-dihydro-7-oxa-8,10-diaza-benzo[a]anthracene-9,11-dione

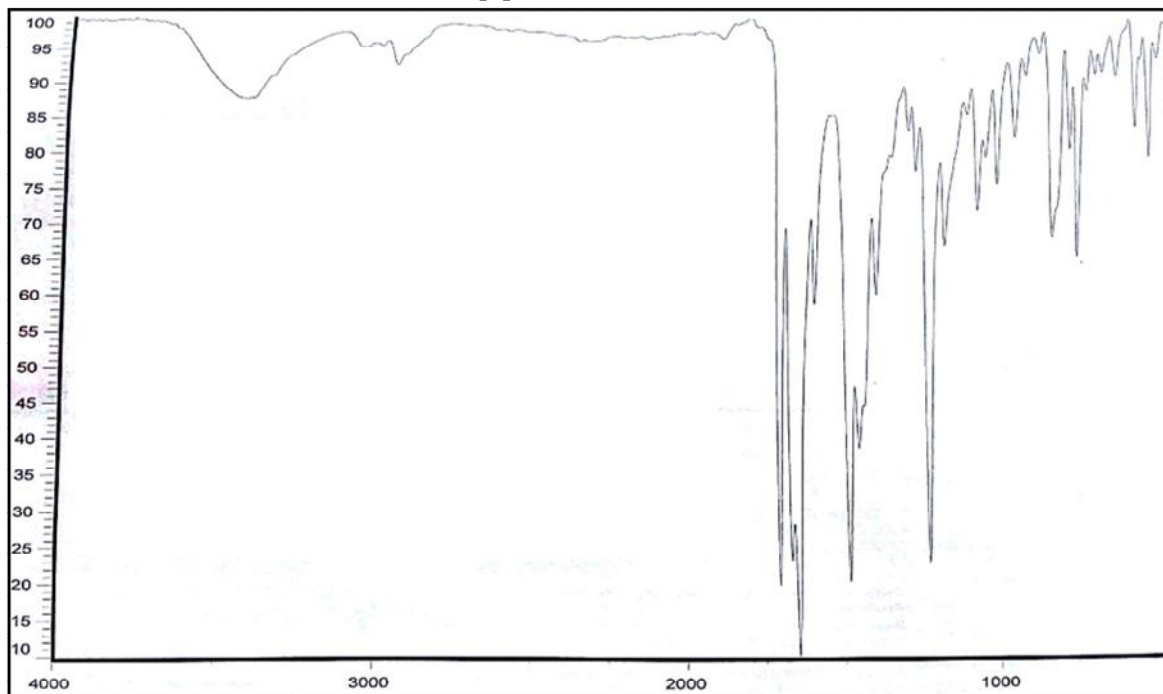

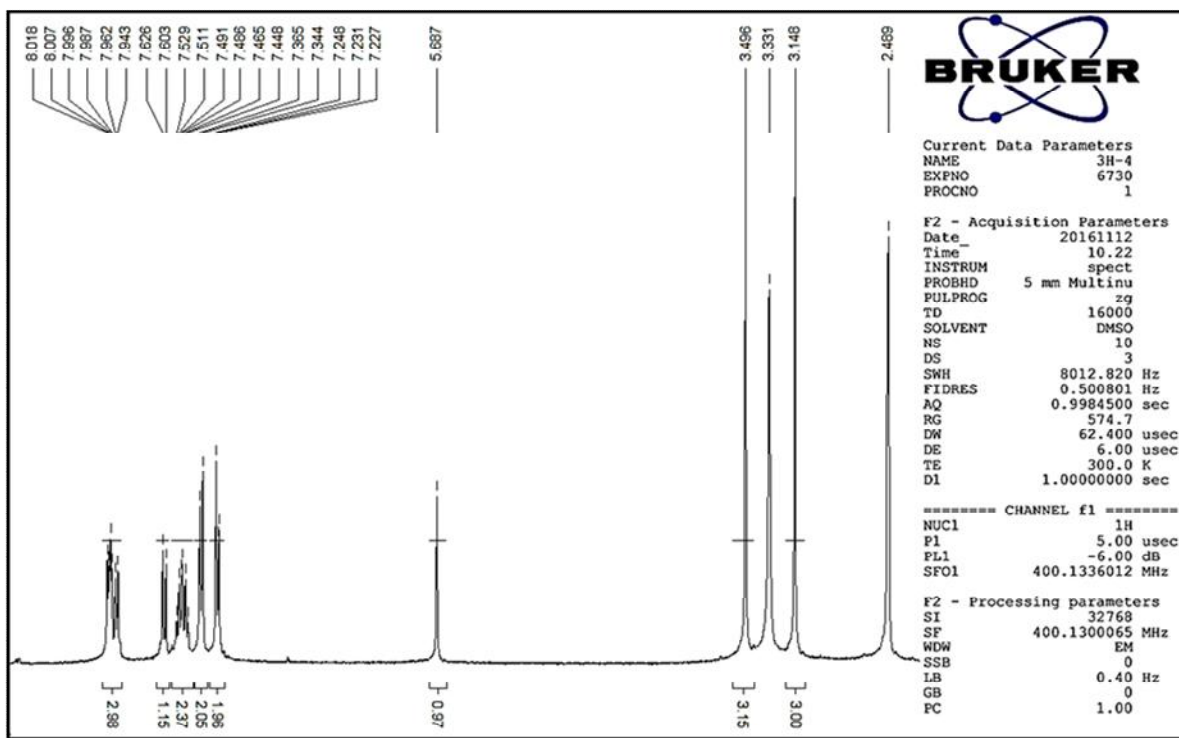

<sup>1</sup>H NMR of 12-(4-Chloro-phenyl)-8,10-dimethyl-8,12-dihydro-7-oxa-8,10-diaza-benzo[a]anthracene-9,11-dione

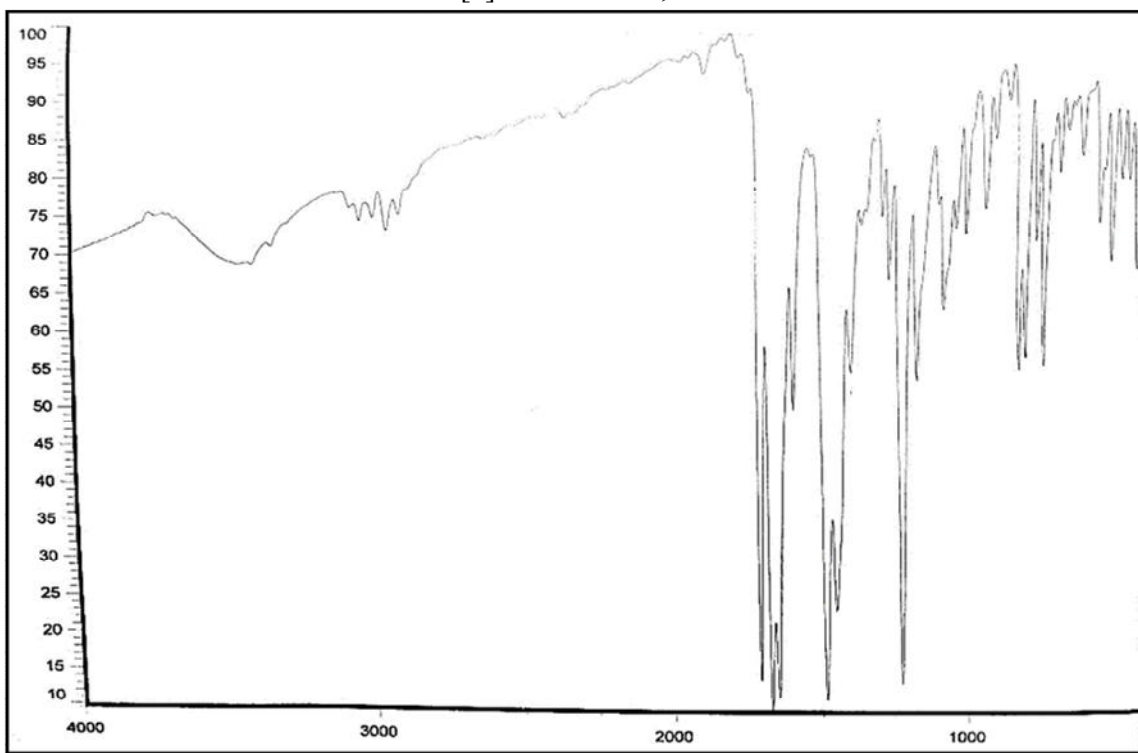

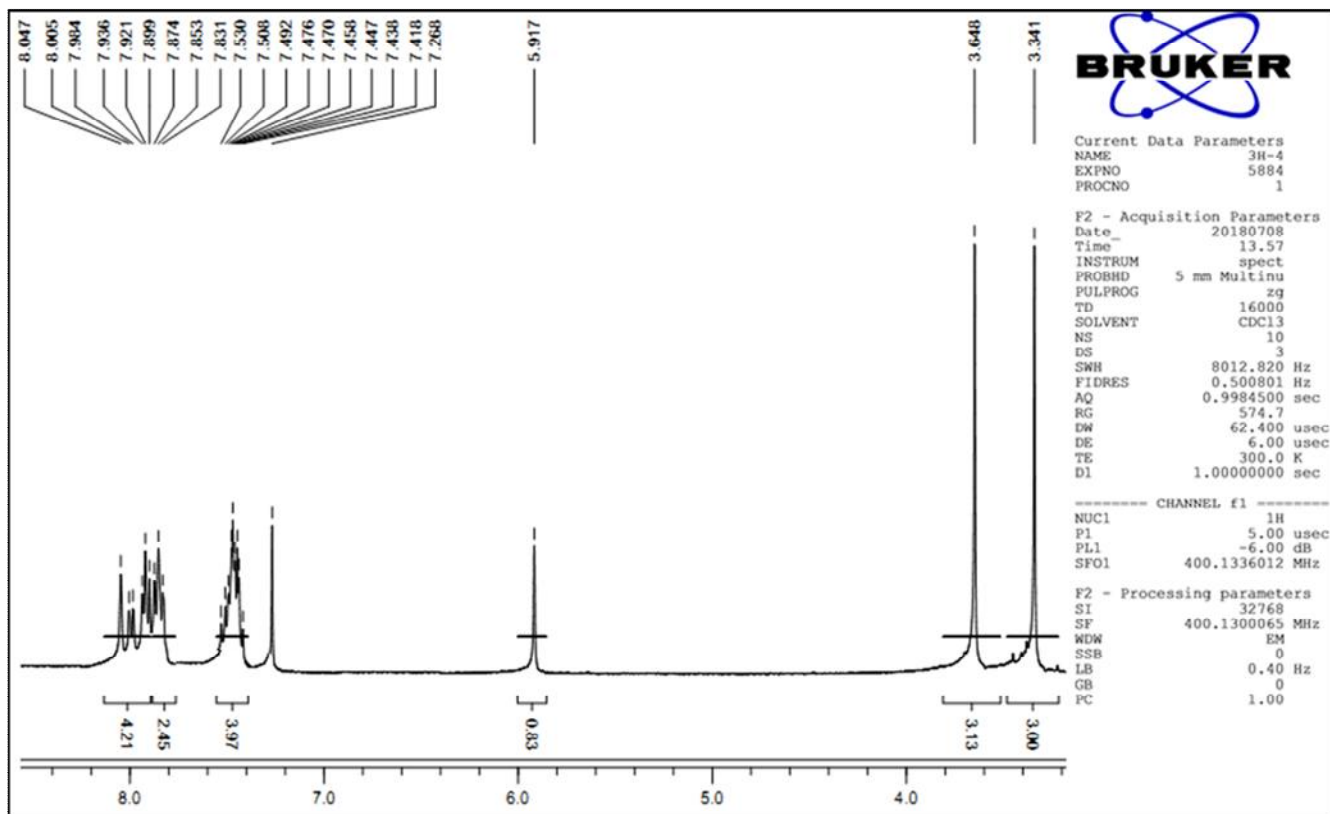

<sup>1</sup>H NMR of 8,10-Dimethyl-12-(3-nitro-phenyl)-8,12-dihydro-7-oxa-8,10-diaza-benzo[a]anthracene-9,11-dione

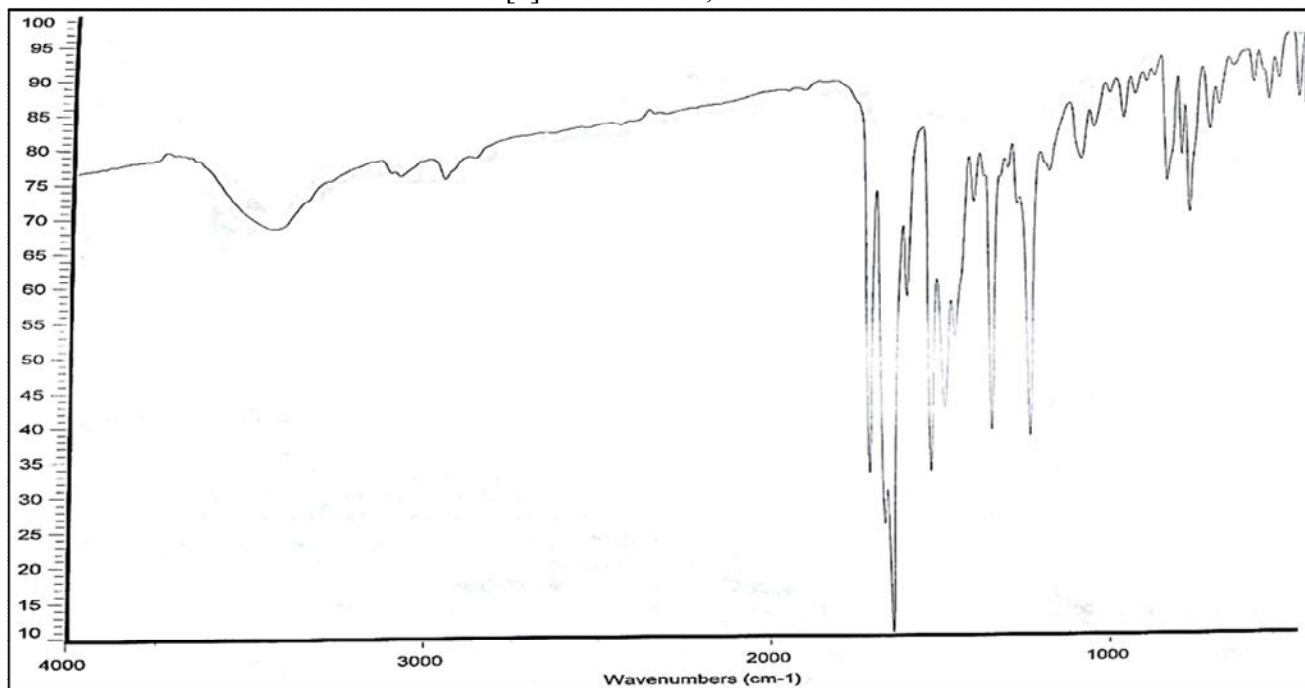

IR of 8,10-Dimethyl-12-(3-nitro-phenyl)-8,12-dihydro-7-oxa-8,10-diaza-benzo[a]anthracene-9,11-dione

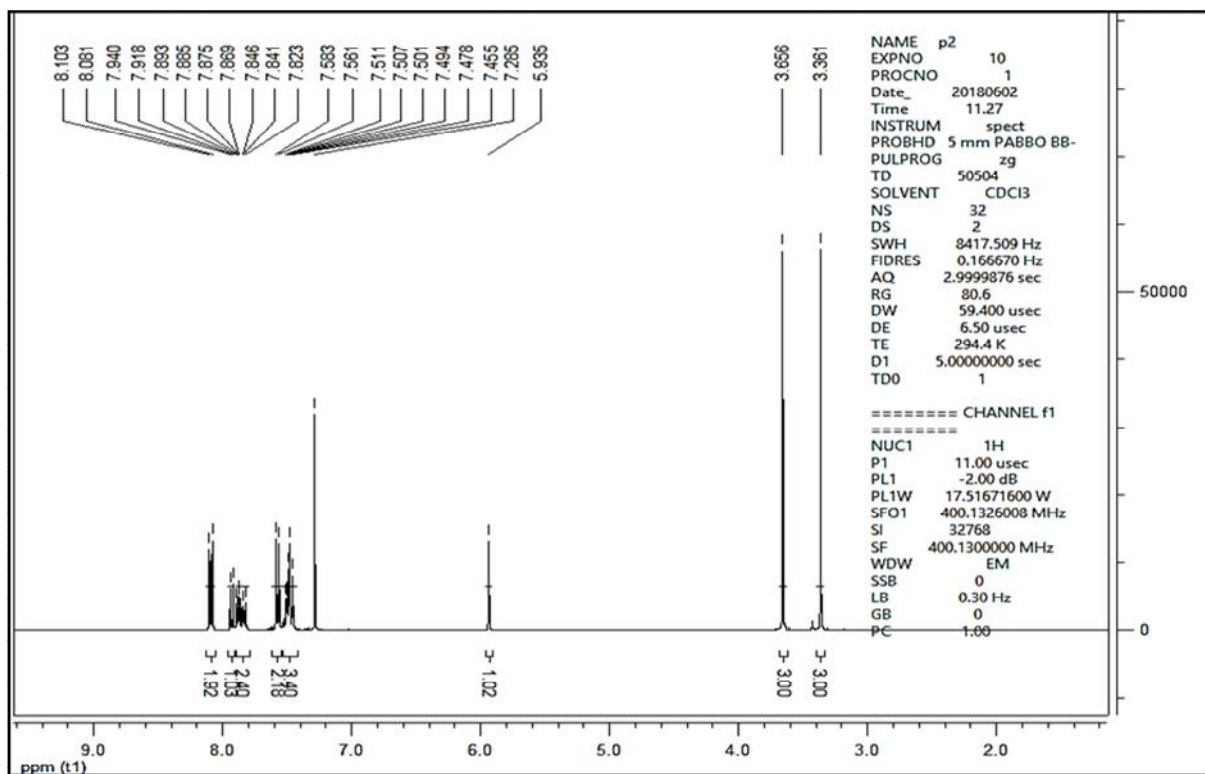

<sup>1</sup>H NMR of 8,10-Dimethyl-12-(4-nitro-phenyl)-8,12-dihydro-7-oxa-8,10-diaza-benzo[a]anthracene-9,11-dione

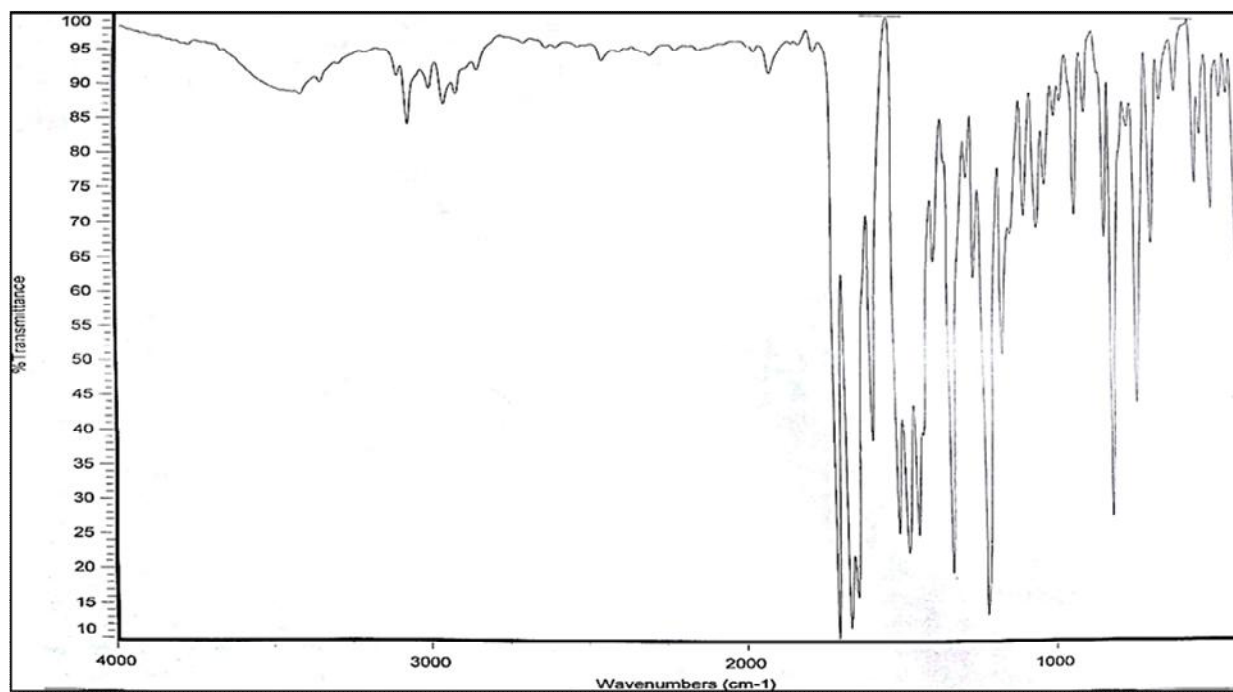

IR of 8,10-Dimethyl-12-(4-nitro-phenyl)-8,12-dihydro-7-oxa-8,10-diaza-benzo[a]anthracene-9,11-dione

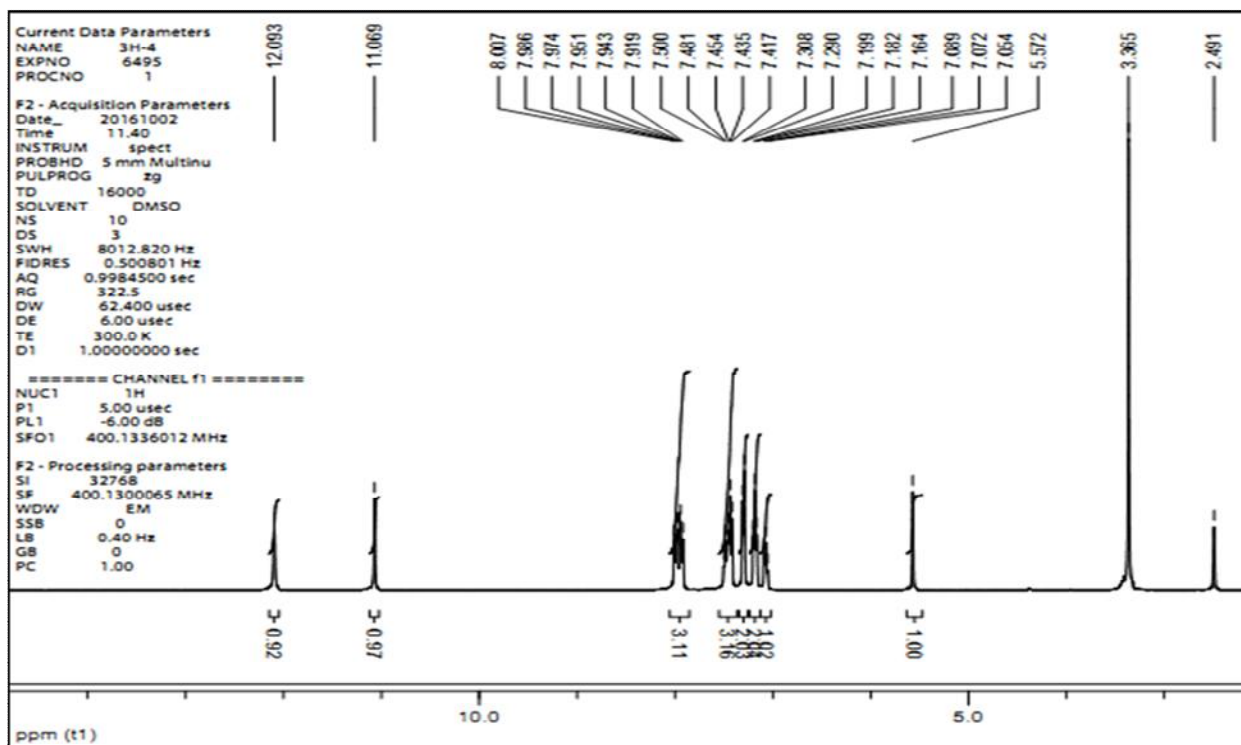

$^1\text{H}$  NMR of 12-Phenyl-8,12-dihydro-7-oxa-8,10-diaza-benzo[a]anthracene-9,11-dione

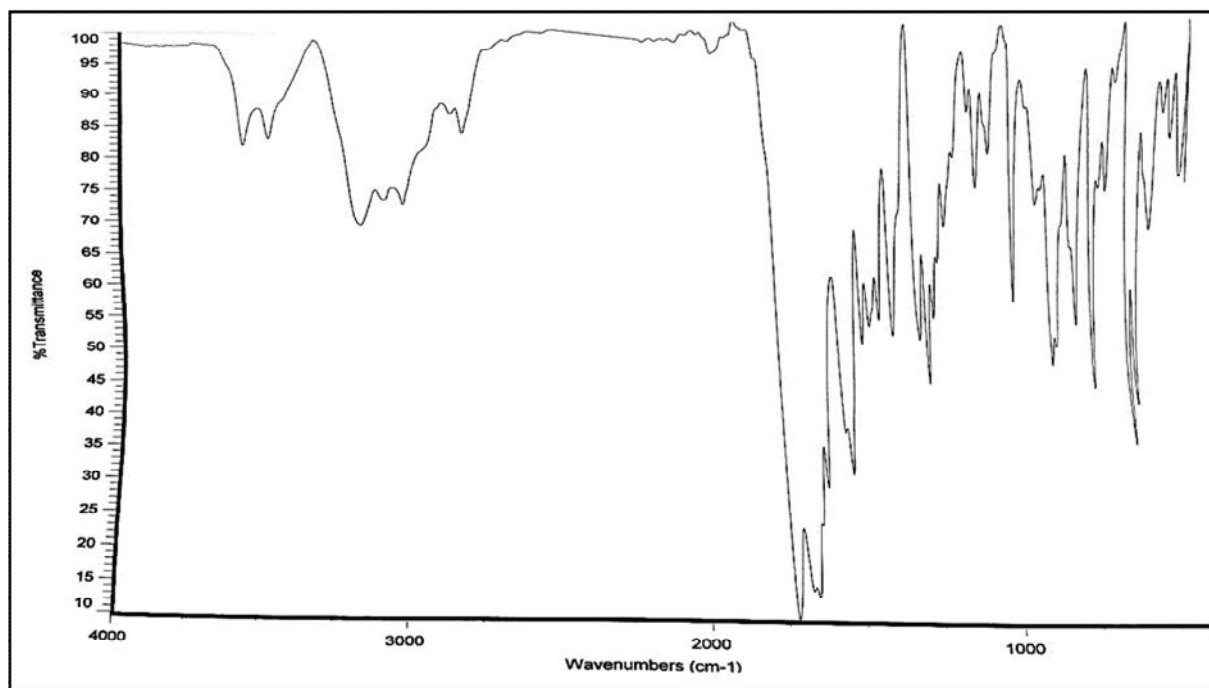

IR of 12-Phenyl-8,12-dihydro-7-oxa-8,10-diaza-benzo[a]anthracene-9,11-dione



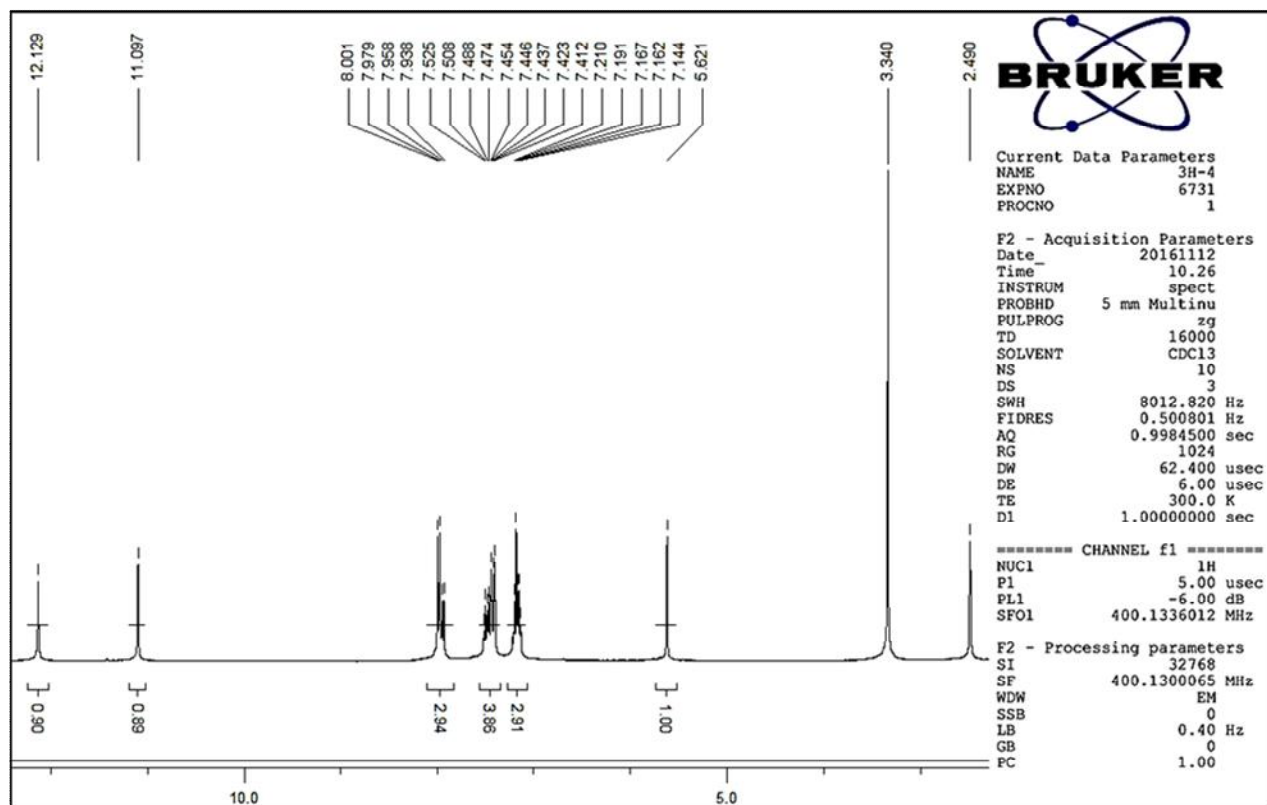

<sup>1</sup>H NMR of 12-(3-Chloro-phenyl)-8,12-dihydro-7-oxa-8,10-diaza-benzo[a]anthracene-9,11-dione

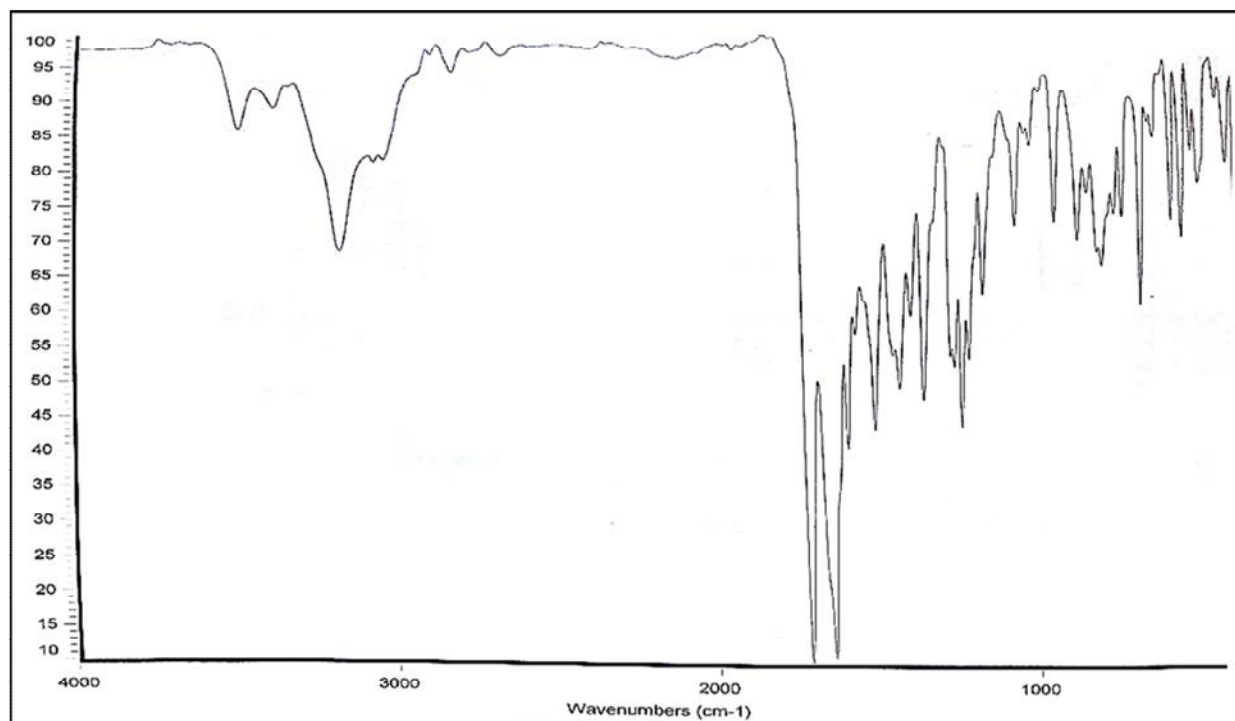

IR of 12-(3-Chloro-phenyl)-8,12-dihydro-7-oxa-8,10-diaza-benzo[a]anthracene-9,11-dione

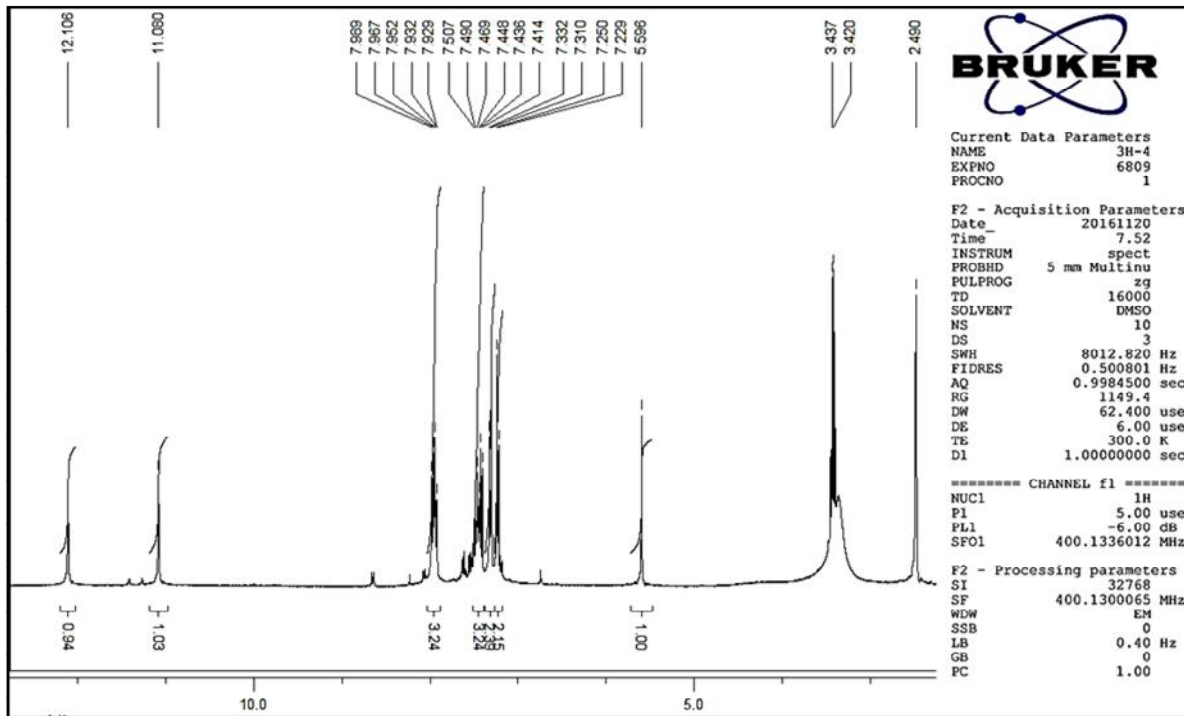

<sup>1</sup>H NMR of 12-(4-Chloro-phenyl)-8,12-dihydro-7-oxa-8,10-diaza-benzo[a]anthracene-9,11-dione

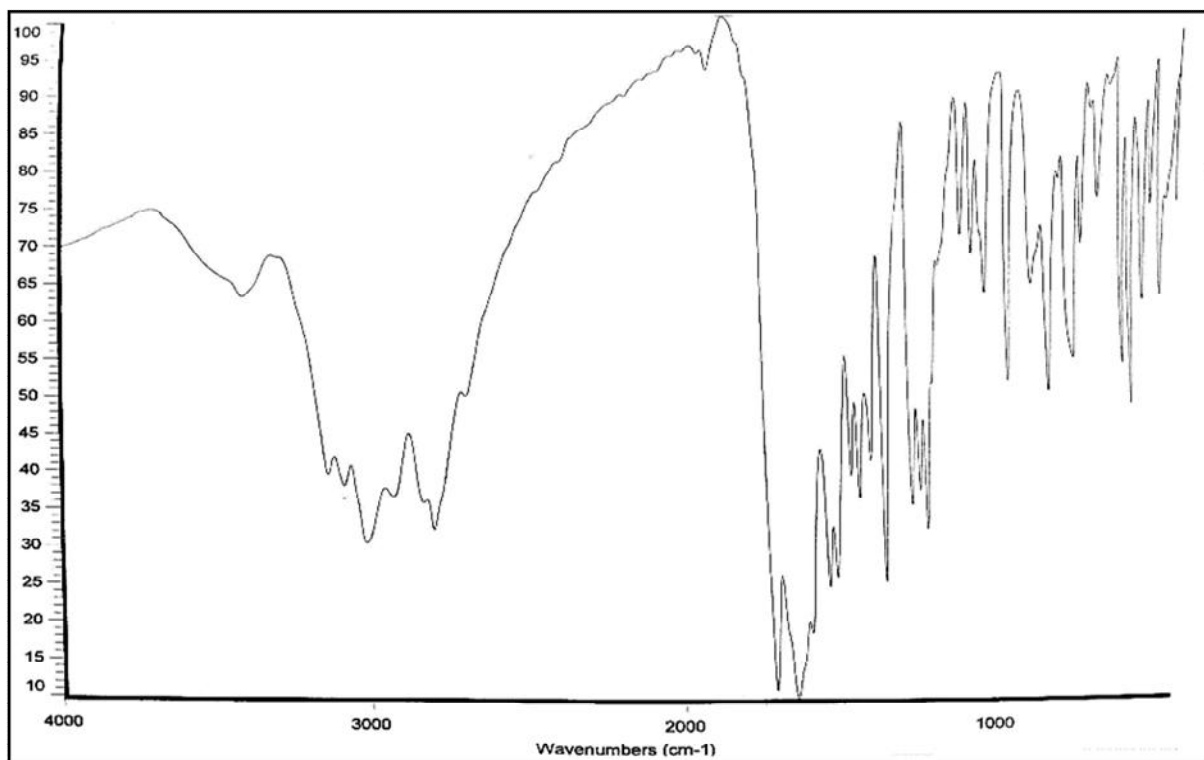

IR of 12-(4-Chloro-phenyl)-8,12-dihydro-7-oxa-8,10-diaza-benzo[a]anthracene-9,11-dione

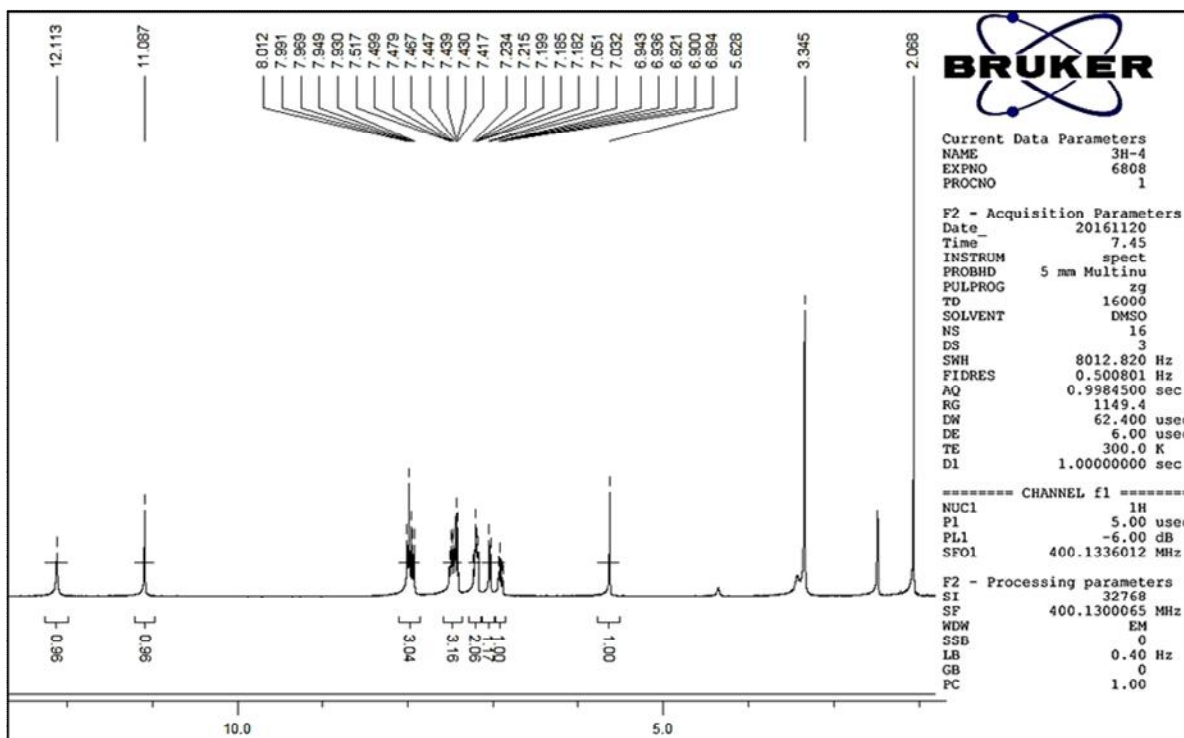

<sup>1</sup>H NMR of 12-(3-Fluoro-phenyl)-8,12-dihydro-7-oxa-8,10-diaza-benzo[a]anthracene-9,11-dione

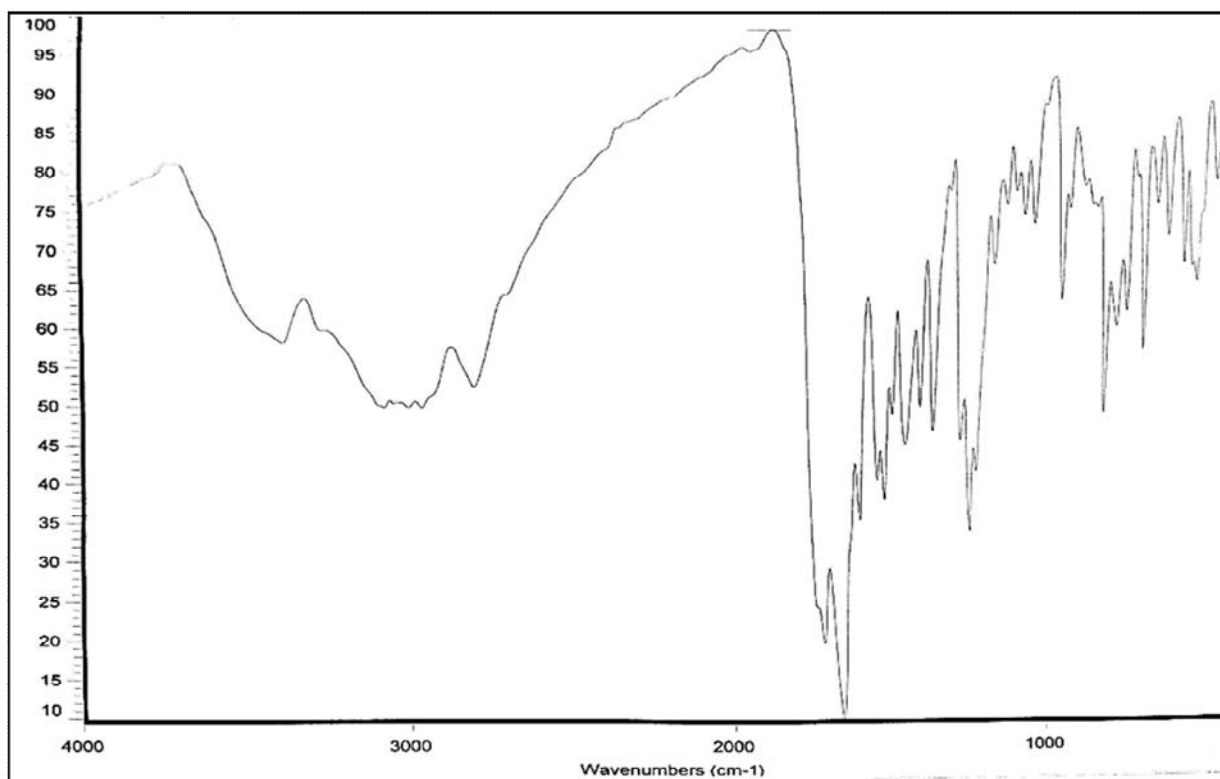

IR of 12-(3-Fluoro-phenyl)-8,12-dihydro-7-oxa-8,10-diaza-benzo[a]anthracene-9,11-dione

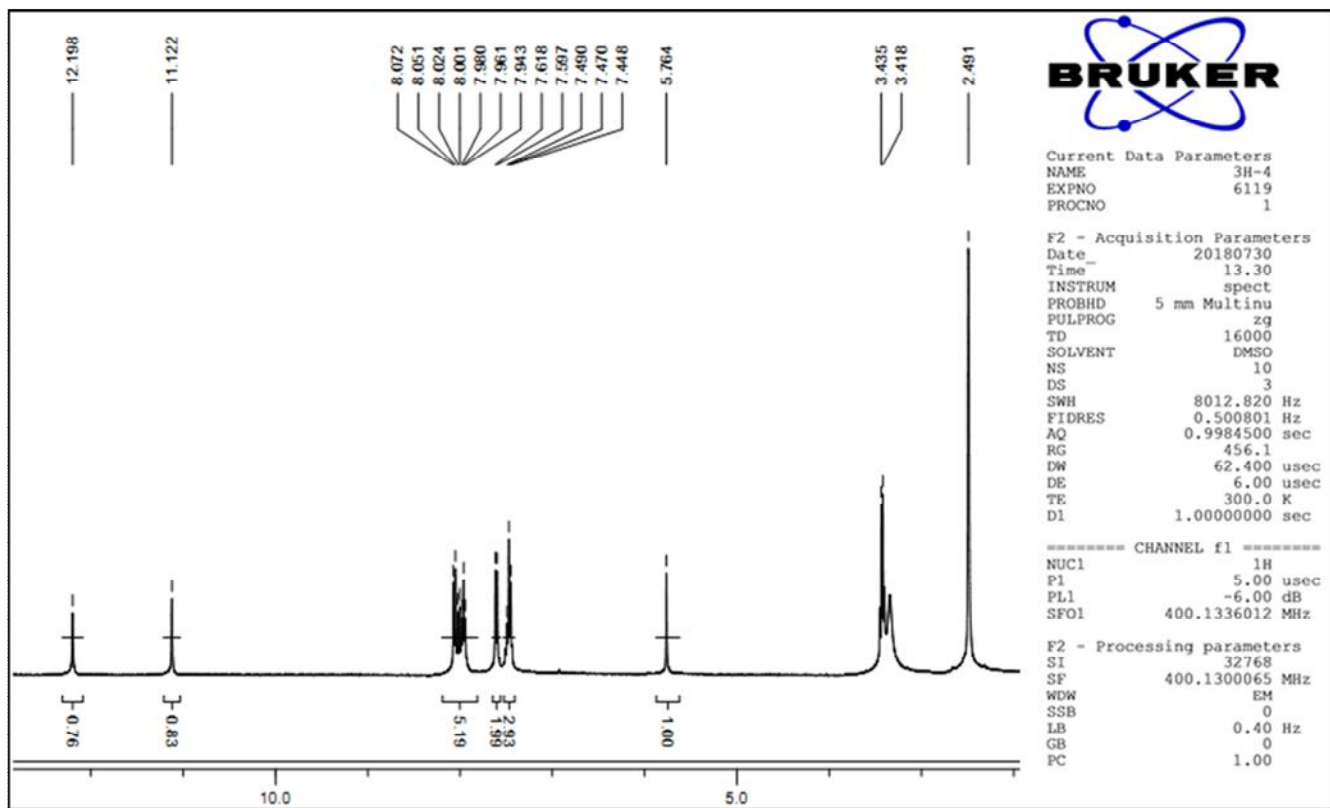

<sup>1</sup>H NMR of 12-(4-Nitro-phenyl)-8,12-dihydro-7-oxa-8,10-diaza-benzo[a]anthracene-9,11-dione

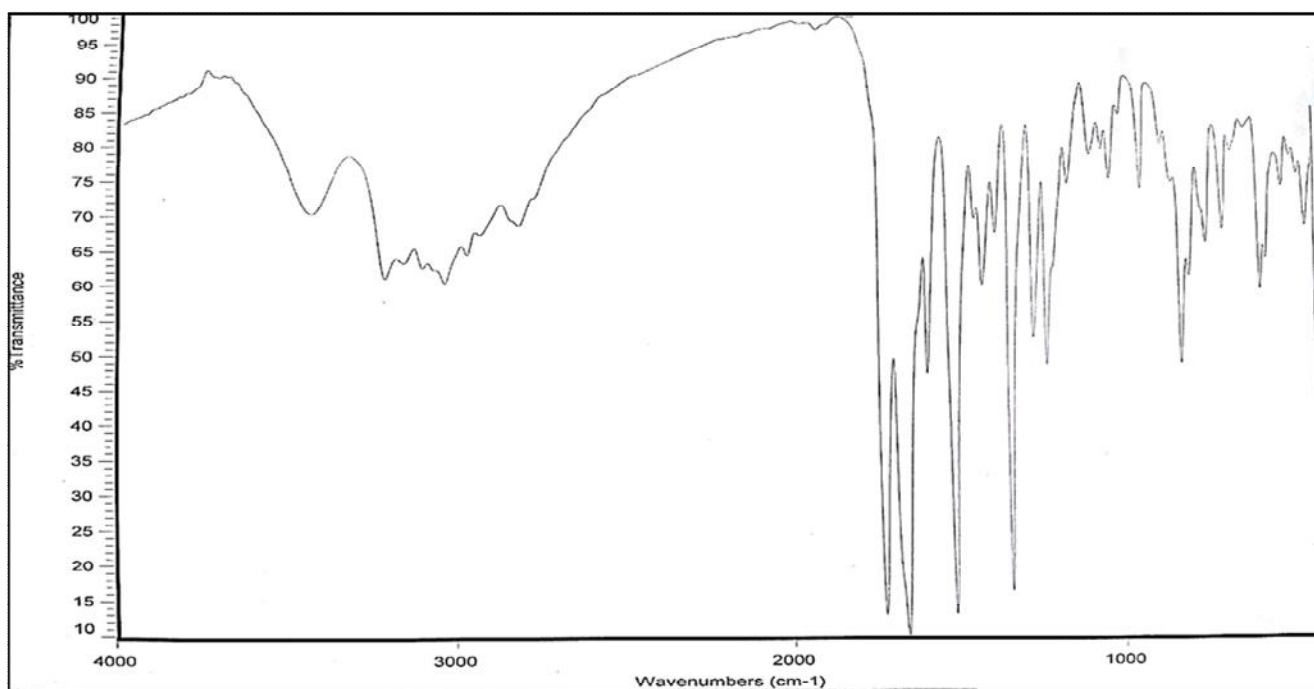

IR of 12-(4-Nitro-phenyl)-8,12-dihydro-7-oxa-8,10-diaza-benzo[a]anthracene-9,11-dione

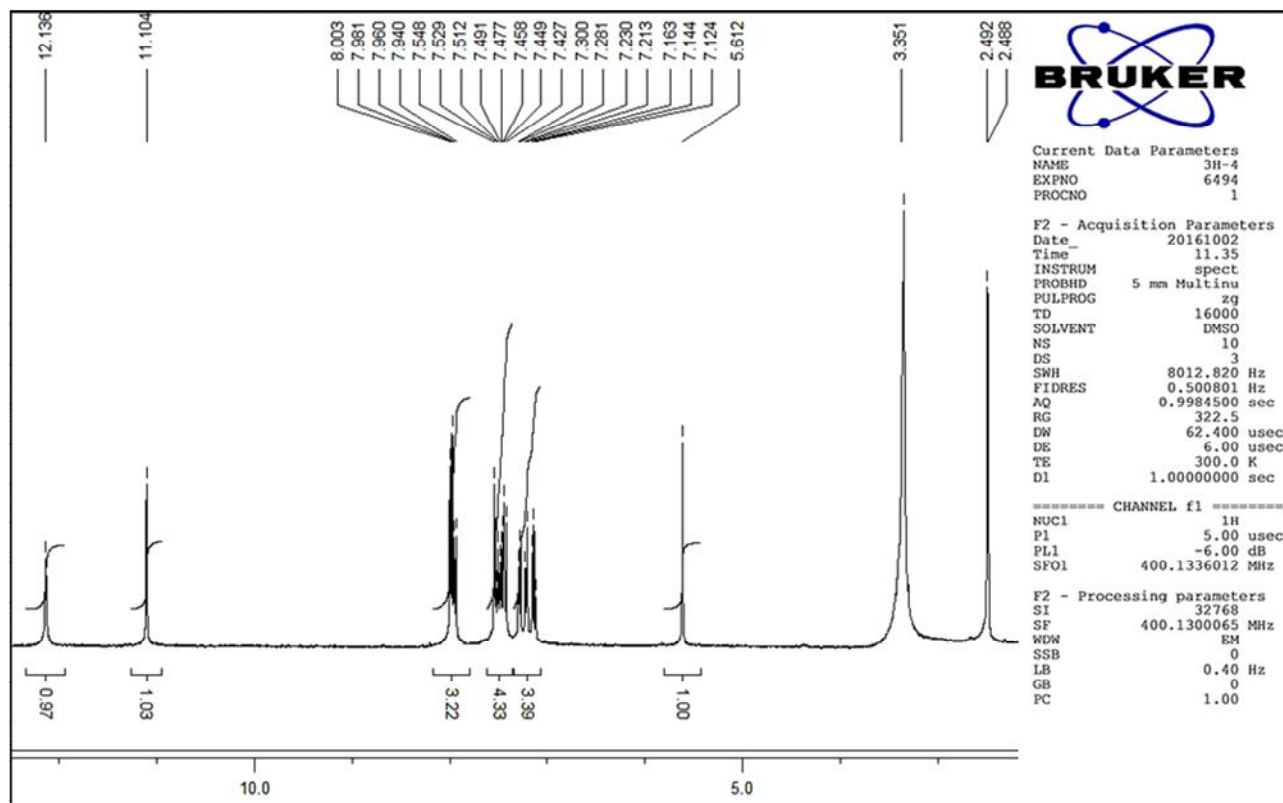

<sup>1</sup>H NMR of 12-(3-Bromo-phenyl)-8,12-dihydro-7-oxa-8,10-diaza-benzo[a]anthracene-9,11-dione

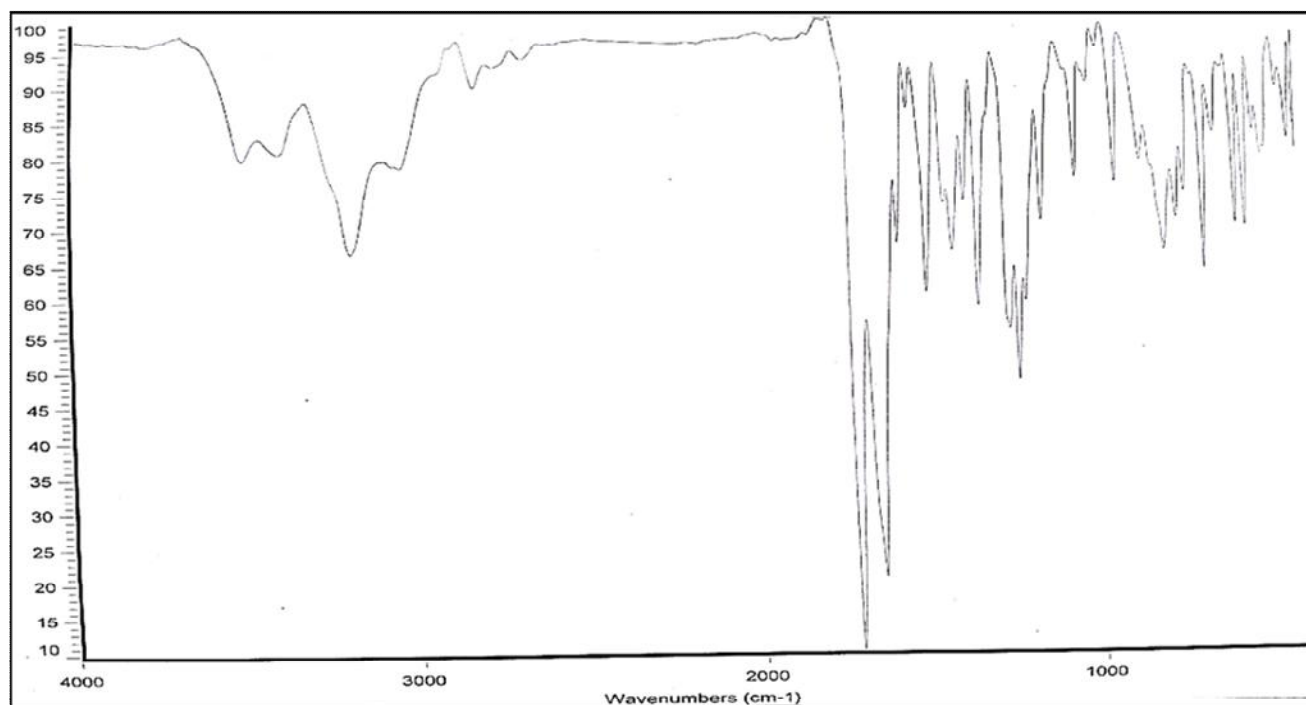

IR of 12-(3-Bromo-phenyl)-8,12-dihydro-7-oxa-8,10-diaza-benzo[a]anthracene-9,11-dione

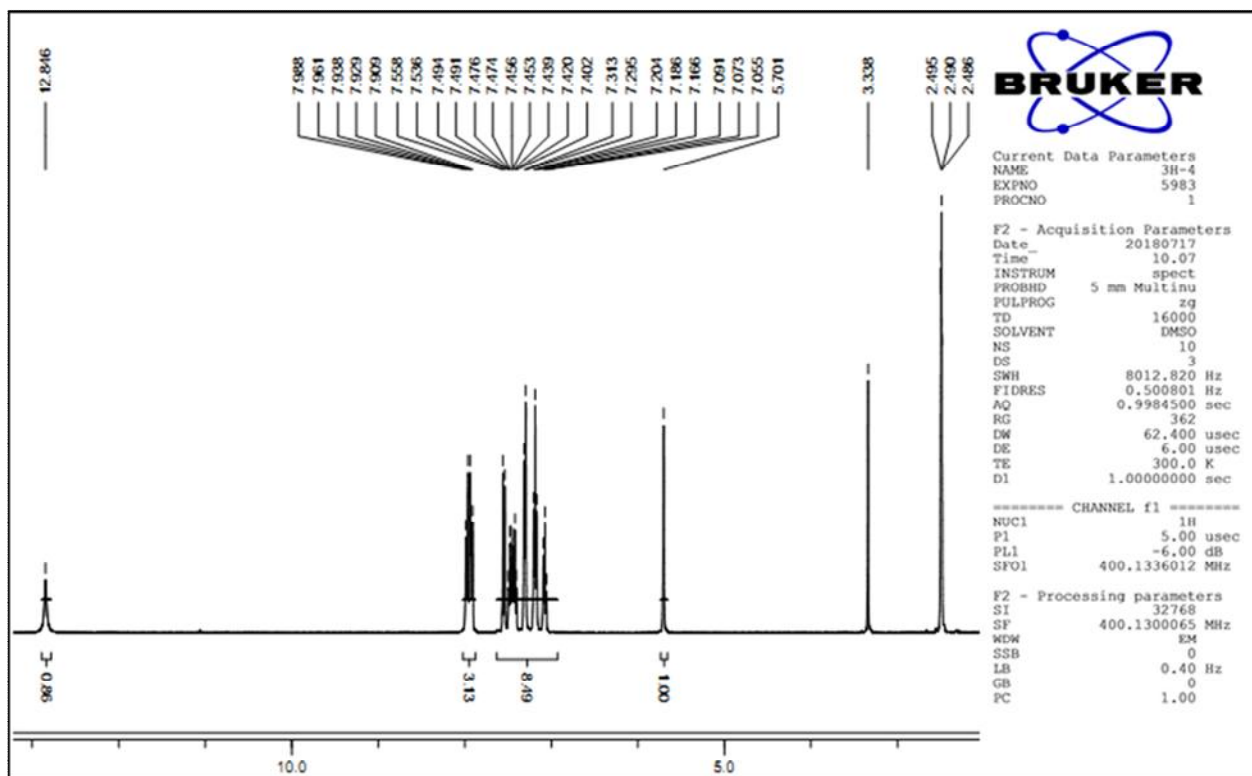

<sup>1</sup>H NMR of 12-Phenyl-9-thioxo-8,9,10,12-tetrahydro-7-oxa-8,10-diaza-benzo[a]anthracen-11-one

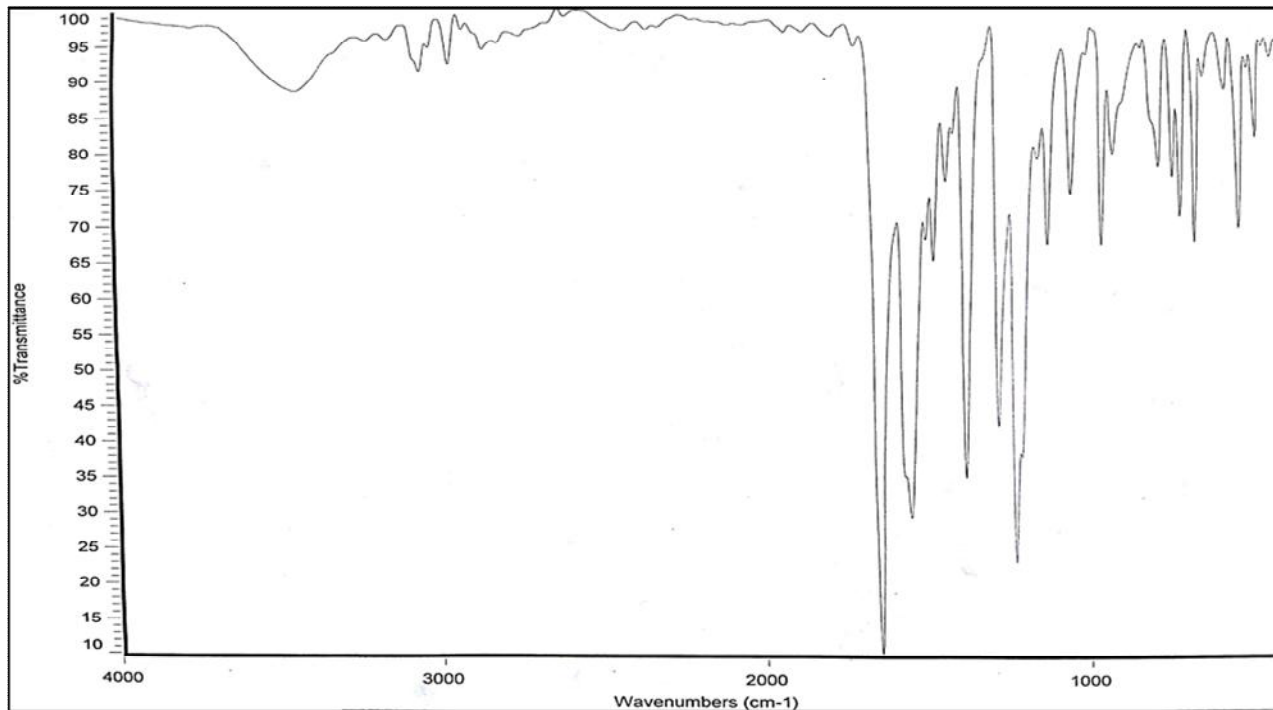

IR of 12-Phenyl-9-thioxo-8,9,10,12-tetrahydro-7-oxa-8,10-diaza-benzo[a]anthracen-11-one

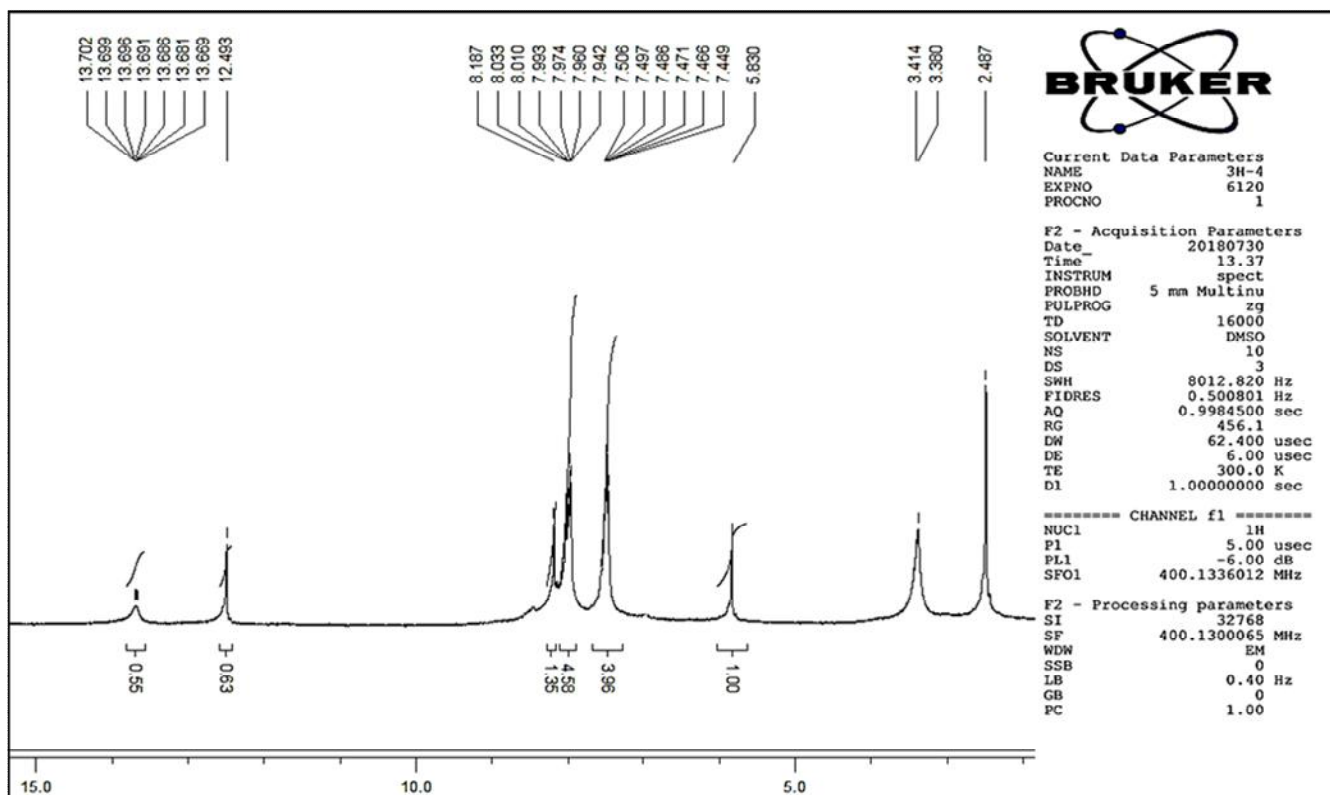

<sup>1</sup>H NMR of 12-(3-Nitro-phenyl)-9-thioxo-8,9,10,12-tetrahydro-7-oxa-8,10-diaza-benzo[a]anthracen-11-one

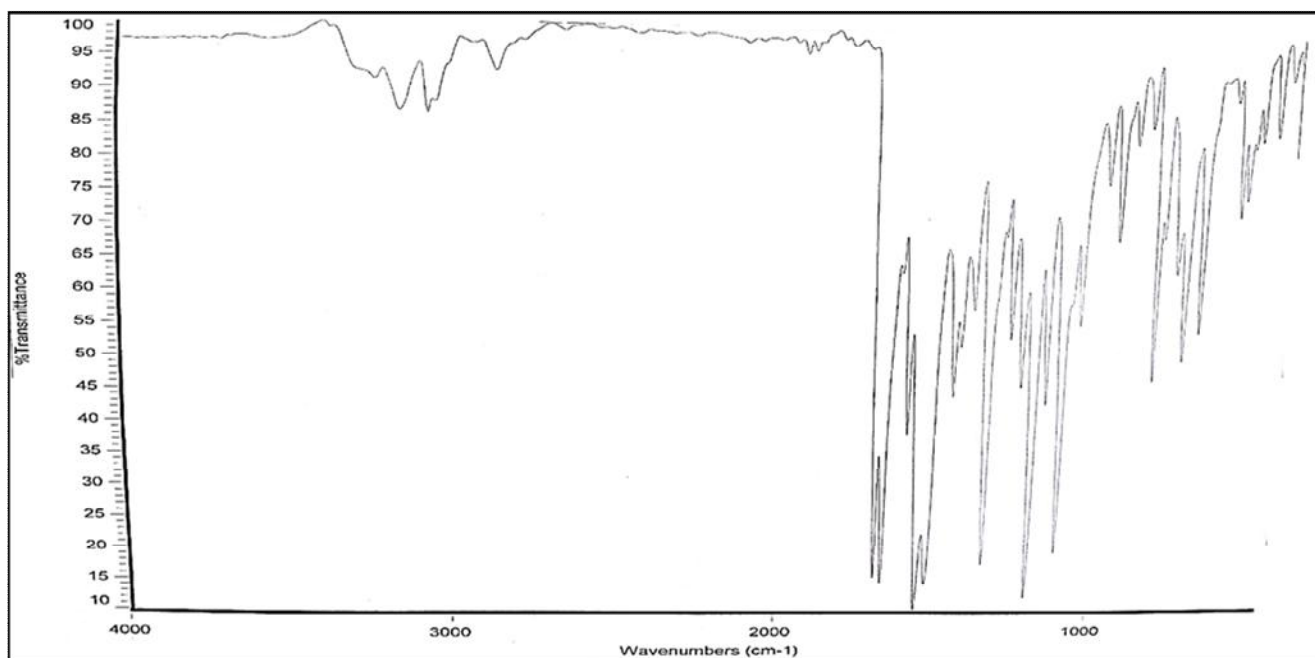

IR of 12-(3-Nitro-phenyl)-9-thioxo-8,9,10,12-tetrahydro-7-oxa-8,10-diaza-benzo[a]anthracen-11-one

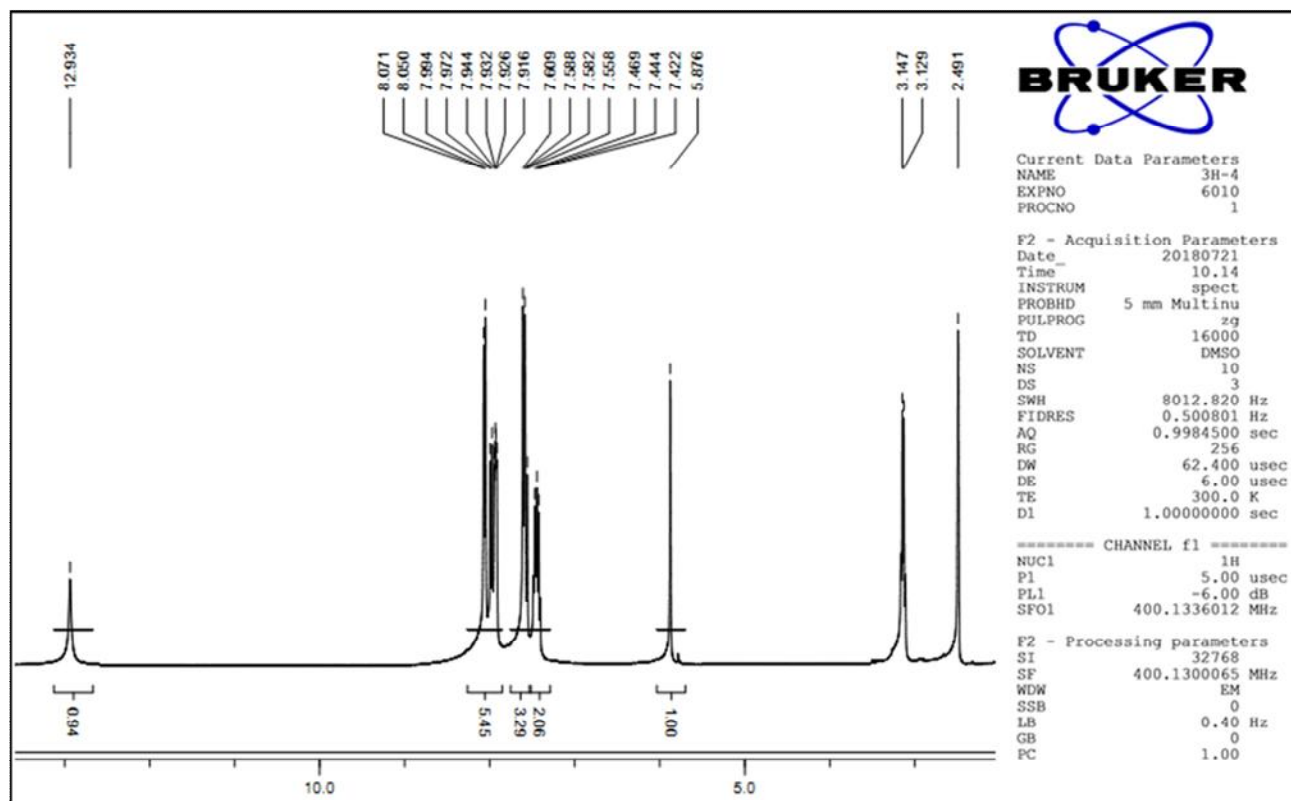

<sup>1</sup>H NMR of 12-(4-Nitro-phenyl)-9-thioxo-8,9,10,12-tetrahydro-7-oxa-8,10-diaza-benzo[a]anthracen-11-one

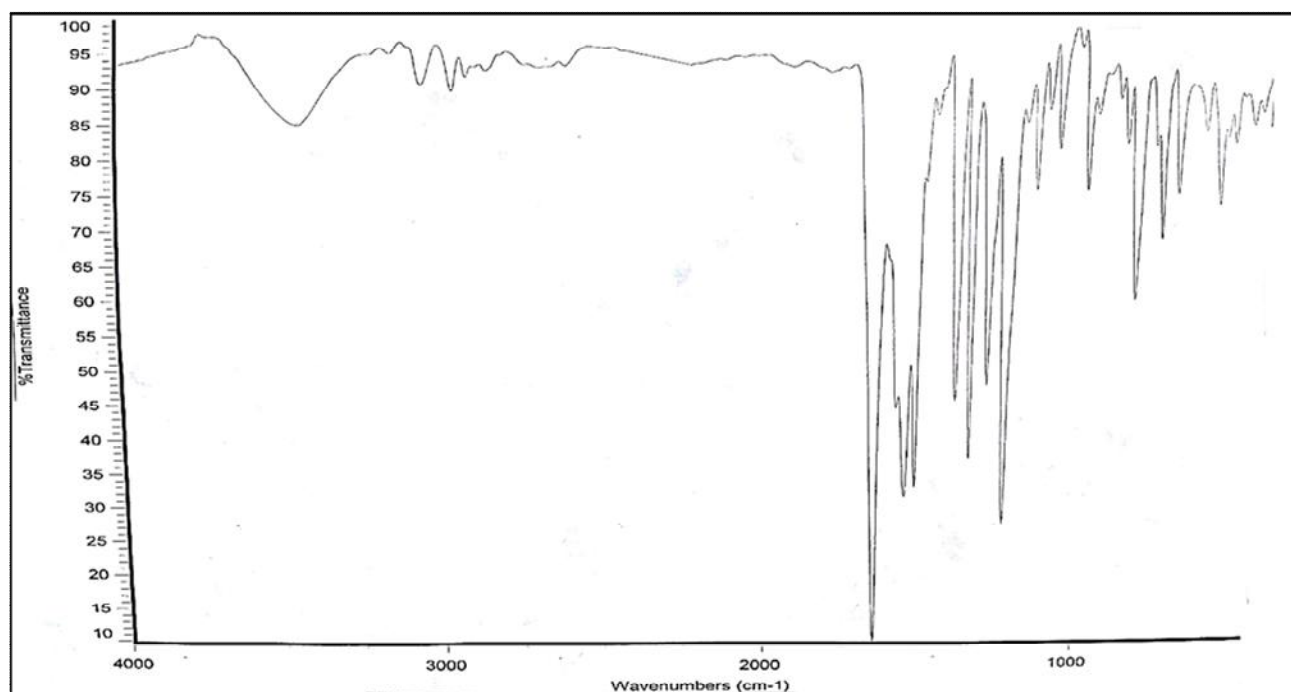

IR of 12-(4-Nitro-phenyl)-9-thioxo-8,9,10,12-tetrahydro-7-oxa-8,10-diaza-benzo[a]anthracen-11-one



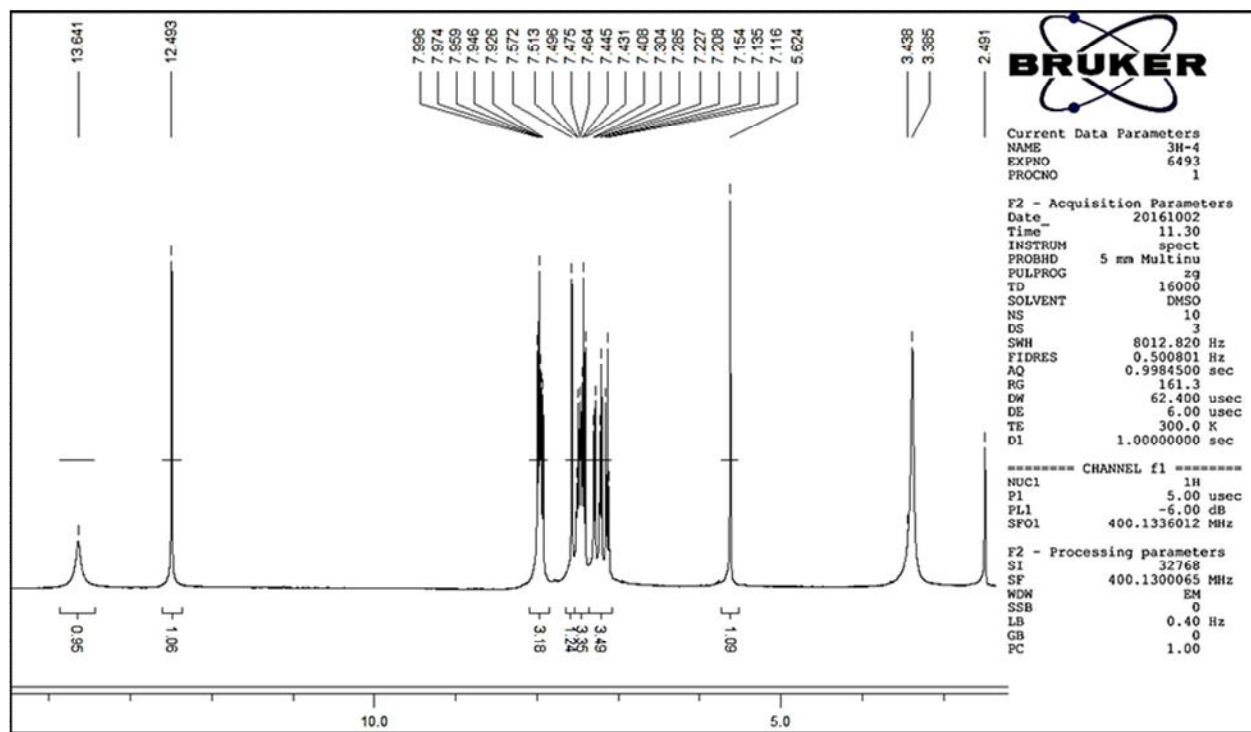

<sup>1</sup>H NMR of 12-(3-Bromo-phenyl)-9-thioxo-8,9,10,12-tetrahydro-7-oxa-8,10-diaza-benzo[a]anthracen-11-one

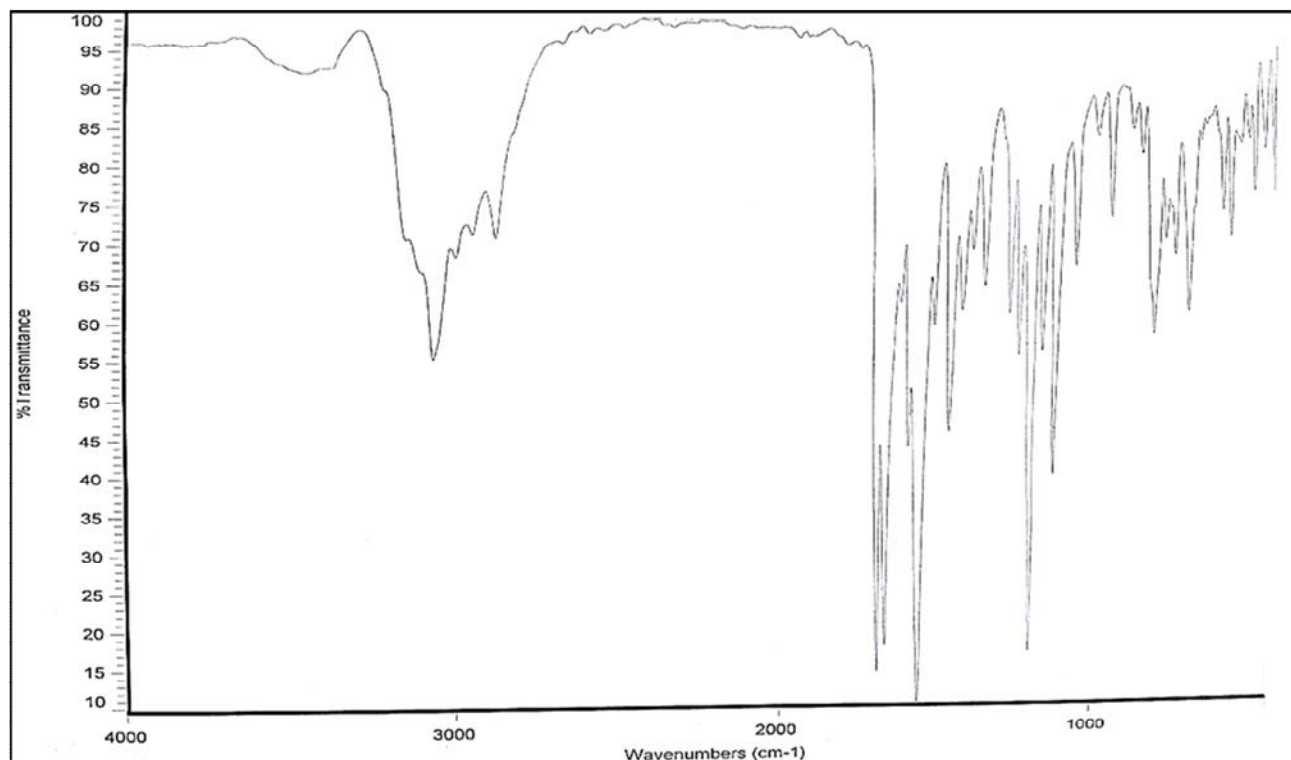

IR of 12-(3-Bromo-phenyl)-9-thioxo-8,9,10,12-tetrahydro-7-oxa-8,10-diaza-benzo[a]anthracen-11-one

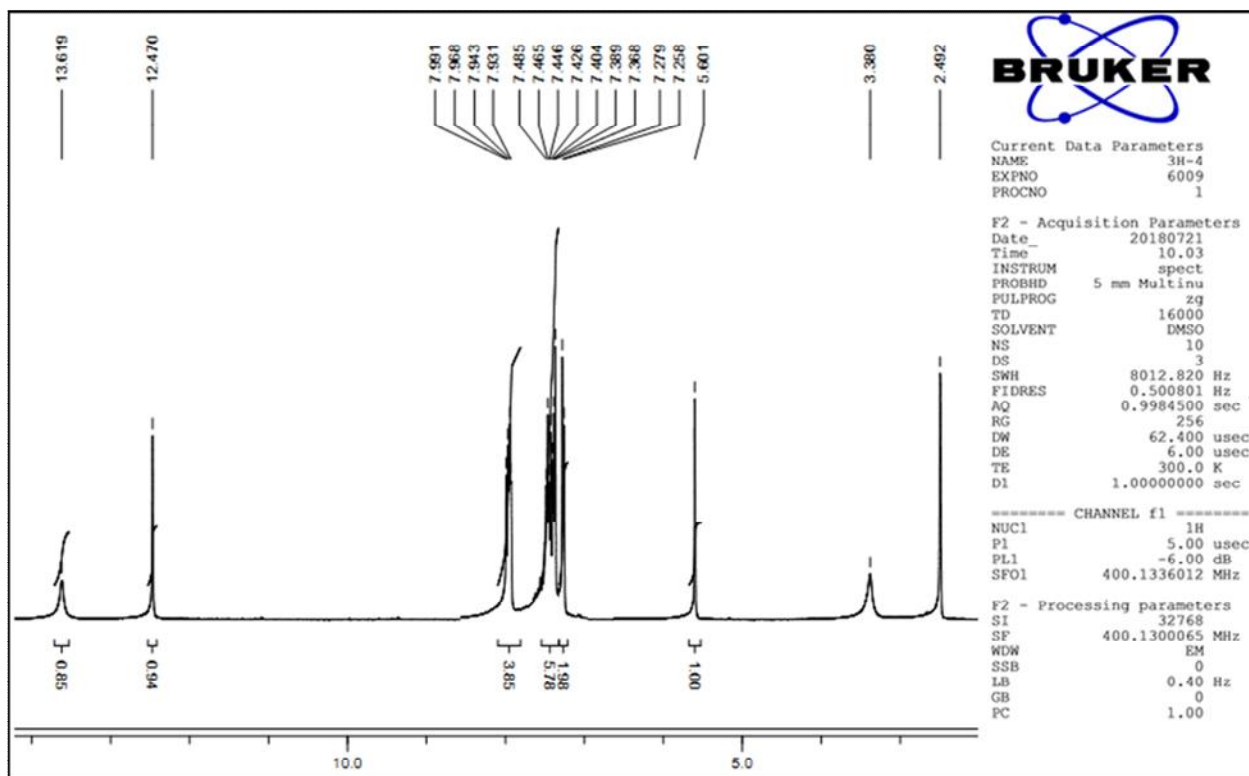

$^1\text{H}$  NMR of 12-(4-Bromo-phenyl)-9-thioxo-8,9,10,12-tetrahydro-7-oxa-8,10-diaza-benzo[a]anthracen-11-one

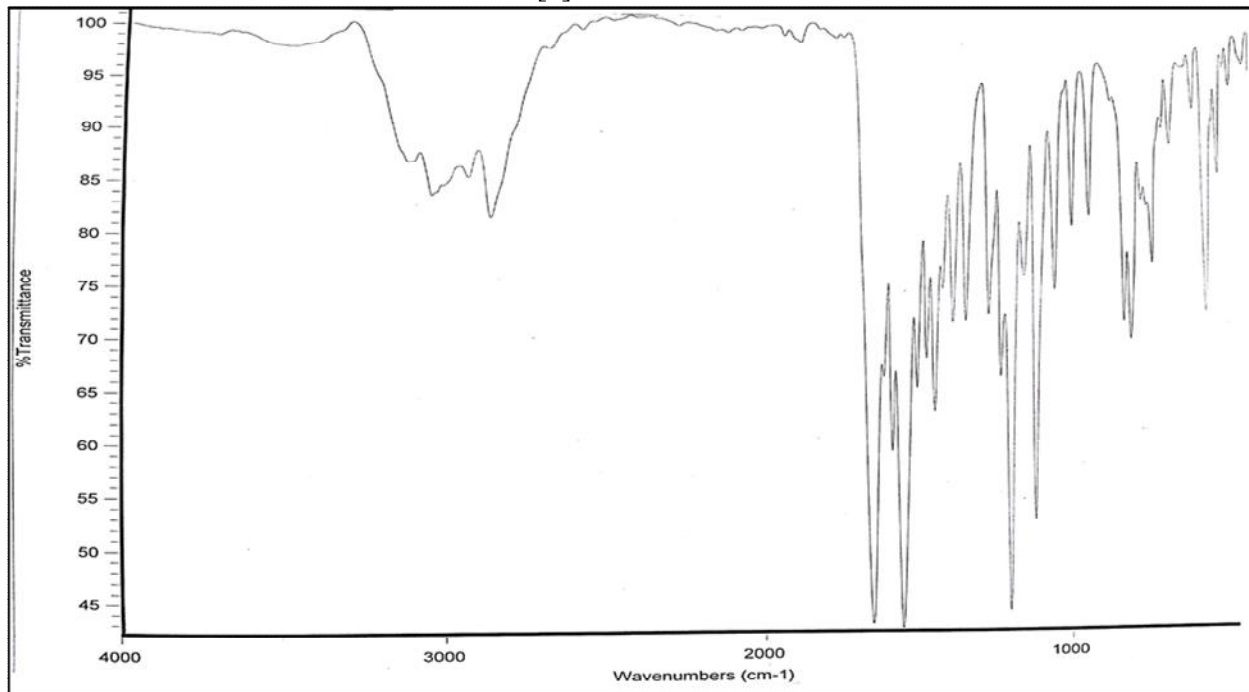

IR of 12-(4-Bromo-phenyl)-9-thioxo-8,9,10,12-tetrahydro-7-oxa-8,10-diaza-benzo[a]anthracen-11-one

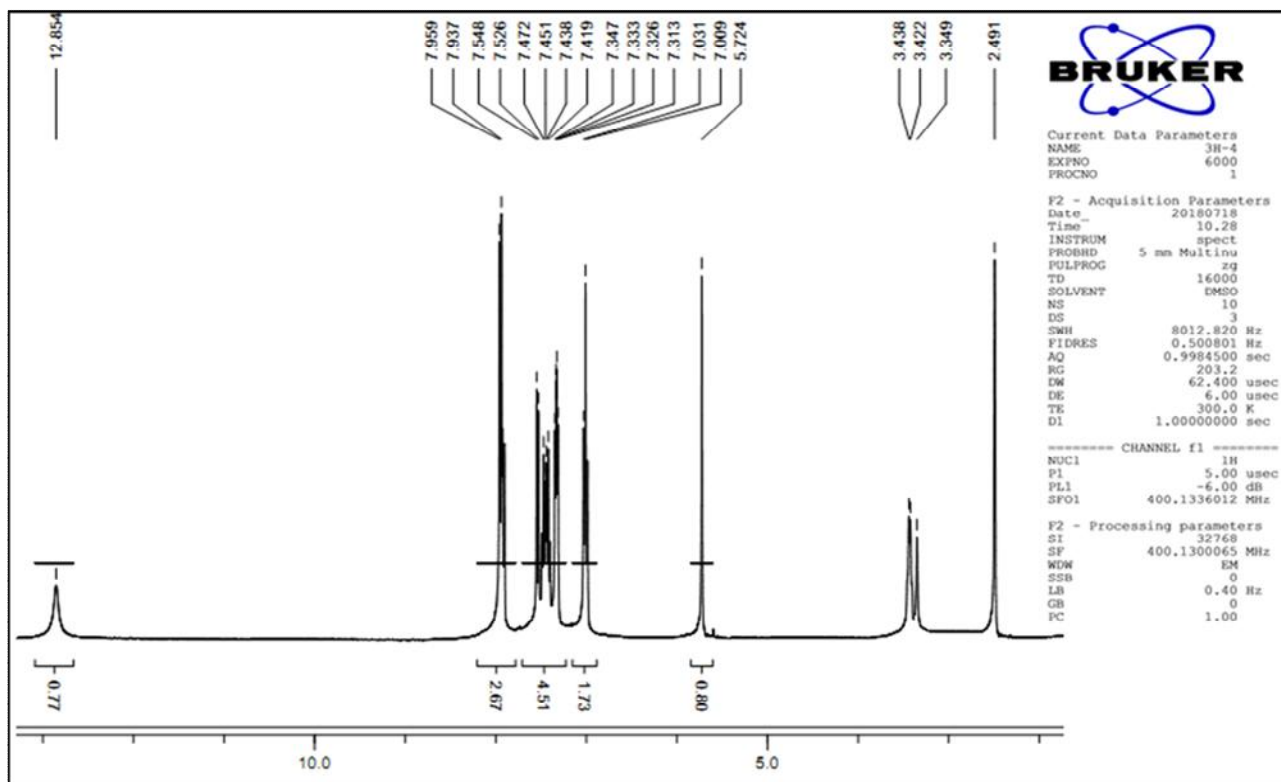

<sup>1</sup>H NMR of 12-(4-Fluoro-phenyl)-9-thioxo-8,9,10,12-tetrahydro-7-oxa-8,10-diaza-benzo[a]anthracen-11-one

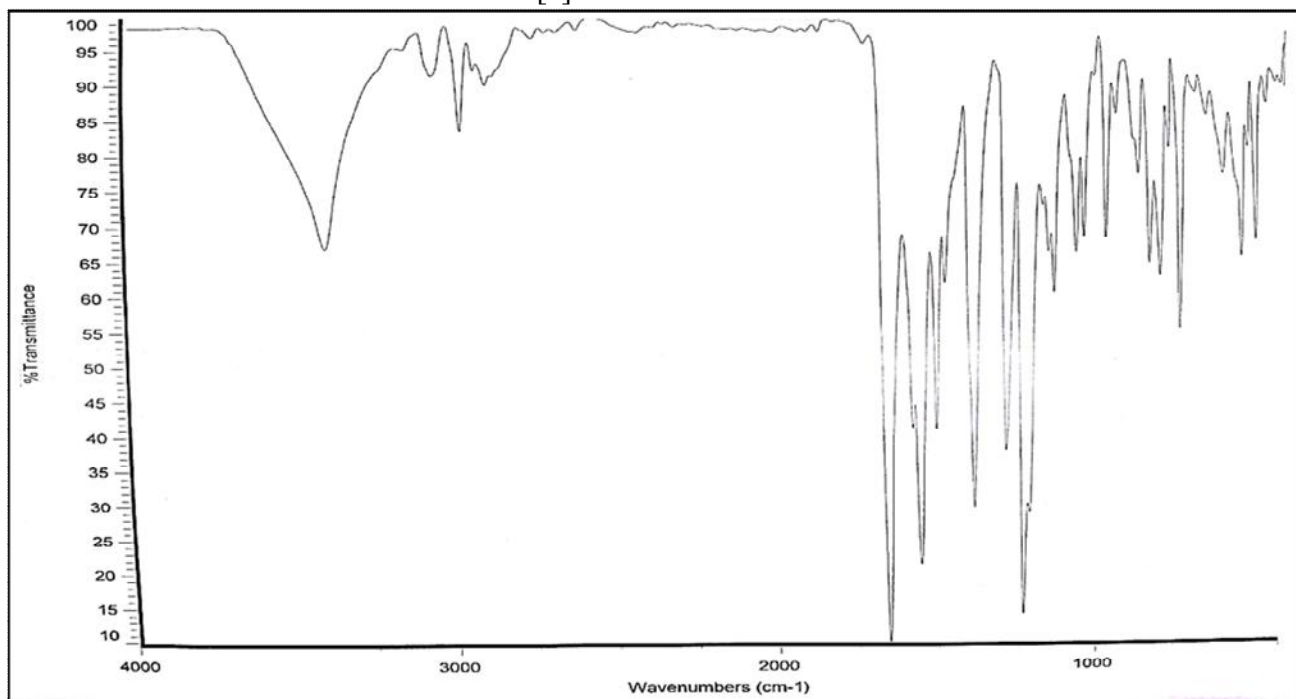

IR of 12-(4-Fluoro-phenyl)-9-thioxo-8,9,10,12-tetrahydro-7-oxa-8,10-diaza-benzo[a]anthracen-11-one
